# Supplementary material
Source: publisher site journal article supplement (https://www.dovepress.com/article/466624)
Supplement: Supplementary file 1 [file get_supplementary_file.php]

**Supplementary Table 1 The elution gradient.**

| Time(min) | A% | B% |
| --- | --- | --- |
| 0 | 0 | 0 |
| 2-6 | 0 | 48 |
| 6-10 | 48 | 100 |
| 10-12 | 100 | 100 |
| 12-12.1 | 100 | 0 |
| 12.1-15 | 0 | 0 |

**Supplementary Table 2 The mass spectrometric parameters**.

| Parameter | Positive ion | Negative ion |
| --- | --- | --- |
| Spray Voltage (v) | 3.8 | 3.2 |
| Capillary Temperature(◦C) | 320 | 320 |
| Sheath Gas (Arb) | 30 | 30 |
| Aux Gas (Arb) | 5 | 5 |
| Probe Heater Temp(◦C) | 350 | 350 |

**Supplementary Table 3 The main chemical components of BTQ.**

| RT(min) | Average M/z | Metabolite Name | Adduct Type | Formula | Ontology | KEGGID | HMDBID | Superclass | Class | BTQ |
| --- | --- | --- | --- | --- | --- | --- | --- | --- | --- | --- |
| 1.58 | 160.09679 | (-)-Betonicine | [M+H]+ | C7H13NO3 | Amino acids and derivatives | C08269 | HMDB0029412 | Organic acids and derivatives | Carboxylic acids and derivatives | 287779264 |
| 10.16 | 296.16449 | (-)-Nuciferine | [M+H]+ | C19H21NO2 | Aporphines | --- | --- | Alkaloids and derivatives | Aporphines | 191468784 |
| 11.63 | 537.0827 | (+)-(S)-Skyrin | [M-H]- | C30H18O10 | Hydroxyanthraquinones | --- | --- | Benzenoids | Anthracenes | 326267936 |
| 13.28 | 311.16522 | (+)-Triptophenolide | [M-H]- | C20H24O3 | Oxosteroids | --- | --- | Lipids and lipid-like molecules | Steroids and steroid derivatives | 216143760 |
| 12.02 | 323.12881 | (+/-)-Isobavachin | [M-H]- | C20H20O4 | 8-prenylated flavans | --- | --- | Phenylpropanoids and polyketides | Flavonoids | 163116112 |
| 10.33 | 161.06 | (2E)-3-(4-Methoxyphenyl)Prop-2-Enoic Acid | [M+H-H2O]+ | C10H10O3 | Cinnamic acids | --- | HMDB0002040 | Phenylpropanoids and polyketides | Cinnamic acids and derivatives | 462825344 |
| 10.13 | 113.05968 | (2E,4E)-Hexa-2,4-Dienoic Acid | [M+H]+ | C6H8O2 | Medium-chain fatty acids | --- | HMDB0029581 | Lipids and lipid-like molecules | Fatty Acyls | 454559840 |
| 9.53 | 289.09177 | (2-Methyl-4-Oxopyran-3-Yl) Beta-D-Glucopyranoside | [M+H]+ | C12H16O8 | Glycosyl compounds | --- | --- | Organic oxygen compounds | Organooxygen compounds | 64882084 |
| 1.54 | 203.15028 | (2S)-2-Amino-5-[(E)-2,3-Dimethylcarbamimidamido]Pentanoic Acid | [M+H]+ | C8H18N4O2 | Amino acids and derivatives | --- | HMDB0003334 | Organic acids and derivatives | Carboxylic acids and derivatives | 281053664 |
| 8.78 | 85.06478 | (3E)-Pent-3-En-2-One | [M+H]+ | C5H8O | Alpha,beta-unsaturated carbonyl compounds | --- | HMDB0001184 | Organic oxygen compounds | Organooxygen compounds | 244432416 |
| 10.72 | 225.11218 | (3Z)-3-Butylidene-6,7-Dihydroxy-4,5,6,7-Tetrahydro-2-Benzofuran-1-One | [M+H]+ | C12H16O4 | Isobenzofurans | --- | HMDB0258236 | Organoheterocyclic compounds | Isobenzofurans | 273603264 |
| 8.81 | 217.15633 | (5E)-6,10-Dimethyl-5,9-Undecadien-2-One | [M+Na]+ | C13H22O | Acyclic monoterpenoids | --- | HMDB0031846 | Lipids and lipid-like molecules | Prenol lipids | 861504832 |
| 10.40 | 163.07536 | (E)-Methyl Ester 3-Phenyl-2-Propenoic Acid | [M+H]+ | C10H10O2 | Cinnamic acids and derivatives | C06358 | HMDB0303905 | Phenylpropanoids and polyketides | Cinnamic acids and derivatives | 589822016 |
| 0.99 | 503.16171 | (Glc(Alpha1-4)Glc(Alpha1-4)Glc) | [M-H]- | C18H32O16 | Oligosaccharides | C01835 | HMDB0038852 | Organic oxygen compounds | Organooxygen compounds | 154892480 |
| 9.80 | 286.14377 | (S)-Coclaurine | [M+H]+ | C17H19NO3 | Benzylisoquinolines | C06161 | HMDB0303359 | Organoheterocyclic compounds | Isoquinolines and derivatives | 3954404608 |
| 1.44 | 89.02442 | (S)-Lactate | [M-H]- | C3H6O3 | Alpha hydroxy acids and derivatives | C00186 | HMDB0000190 | Organic acids and derivatives | Hydroxy acids and derivatives | 6212625408 |
| 1.43 | 133.01422 | (S)-Malate | [M-H]- | C4H6O5 | Beta hydroxy acids and derivatives | C00149 | HMDB0000156 | Organic acids and derivatives | Hydroxy acids and derivatives | 10739836928 |
| 9.70 | 272.12808 | (S)-Norcoclaurine | [M+H]+ | C16H17NO3 | Benzylisoquinolines | C06160 | HMDB0033103 | Organoheterocyclic compounds | Isoquinolines and derivatives | 1126969344 |
| 4.36 | 151.07538 | 1-(4-Methoxyphenyl)Ethan-1-One | [M+H]+ | C9H10O2 | Ketones | --- | HMDB0032570 | Organic oxygen compounds | Organooxygen compounds | 369415744 |
| 9.80 | 127.03898 | 1,2,3-Trihydroxybenzene | [M+H]+ | C6H6O3 | Pyrogallols and derivatives | C01108 | HMDB0013674 | Benzenoids | Phenols | 2435868160 |
| 10.25 | 517.13409 | 1,3-Dicaffeoyl-Epi-Quinic Acid | [M+H]+ | C25H24O12 | Cyclic alcohols and derivatives | C10445 | HMDB0029279 | Organic oxygen compounds | Organooxygen compounds | 456571744 |
| 10.38 | 515.11951 | 1,3-Dicaffeoylquinic Acid | [M-H]- | C25H24O12 | Cyclic alcohols and derivatives | C10445 | HMDB0029279 | Organic oxygen compounds | Organooxygen compounds | 4073679872 |
| 1.73 | 527.1582 | 1F-Beta-D-Fructosylsucrose | [M+Na]+ | C18H32O16 | Oligosaccharides | C03661 | HMDB0011729 | Organic oxygen compounds | Organooxygen compounds | 216881040 |
| 9.90 | 217.09718 | 1H,2H,3H,4H,9H-Pyrido[3,4-B]Indole-3-Carboxylic Acid | [M+H]+ | C12H12N2O2 | Beta carbolines | --- | HMDB0035665 | Organoheterocyclic compounds | Indoles and derivatives | 445178304 |
| 1.82 | 96.04494 | 1H-Pyrrole-2-Carboxaldehyde | [M+H]+ | C5H5NO | Organooxygen compounds | --- | HMDB0036057 | Organic oxygen compounds | Organooxygen compounds | 2838625280 |
| 9.90 | 144.08078 | 1-Naphthylamine | [M+H]+ | C10H9N | Naphthalenes | C14790 | HMDB0243964 | Benzenoids | Naphthalenes | 257246048 |
| 10.68 | 347.07617 | 2-(3,4-Dihydroxyphenyl)-5,7-Dihydroxy-6,8-Dimethoxy-4H-Chromen-4-One | [M+H]+ | C17H14O8 | 8-O-methylated flavonoids | --- | --- | Phenylpropanoids and polyketides | Flavonoids | 914221760 |
| 3.96 | 121.06534 | 2,3-Dihydrobenzofuran | [M+H]+ | C8H8O | Coumarans | --- | HMDB0013815 | Organoheterocyclic compounds | Coumarans | 4063407104 |
| 9.84 | 213.07578 | 2,3-Dihydroxy-1-(4-Hydroxy-3-Methoxyphenyl)Propan-1-One | [M+H]+ | C10H12O5 | Ketones | --- | HMDB0041286 | Organic oxygen compounds | Organooxygen compounds | 688961152 |
| 9.99 | 255.05103 | 2,3-Dihydroxy-2-[(4-Hydroxyphenyl)Methyl]Butanedioic Acid | [M-H]- | C11H12O7 | Phenylpropanoic acids | --- | HMDB0030809 | Phenylpropanoids and polyketides | Phenylpropanoic acids | 7017969152 |
| 10.48 | 153.01932 | 2,3-Dihydroxybenzoate | [M-H]- | C7H6O4 | Hydroxybenzoic acid derivatives | C00196 | HMDB0000397 | Benzenoids | Benzene and substituted derivatives | 917343552 |
| 10.40 | 123.04512 | 2,3-Dihydroxytoluene | [M-H]- | C7H8O2 | Catechols | C02923 | HMDB0301753 | Benzenoids | Phenols | 303242560 |
| 6.66 | 183.06519 | 2,6-Dihydroxy-4-Methoxyacetophenone | [M+H]+ | C9H10O4 | Ketones | C10680 | HMDB0029646 | Organic oxygen compounds | Organooxygen compounds | 2679962880 |
| 11.75 | 153.01932 | 2,6-Dihydroxybenzoate | [M-H]- | C7H6O4 | Hydroxybenzoic acid derivatives | C21298 | HMDB0013676 | Benzenoids | Benzene and substituted derivatives | 2149656064 |
| 2.55 | 110.06008 | 2-Aminophenol - 20.0 Ev | [M+H]+ | C6H7NO | Aniline and substituted anilines | C01987 | --- | Benzenoids | Benzene and substituted derivatives | 7161284096 |
| 2.39 | 94.00542 | 2-Chloroacetamide | [M+H]+ | C2H4ClNO | Carboxylic acids and derivatives | --- | HMDB0250106 | Organic acids and derivatives | Carboxylic acids and derivatives | 392948480 |
| 1.65 | 99.0446 | 2-Furanmethanol | [M+H]+ | C5H6O2 | Heteroaromatic compounds | C20441 | HMDB0013742 | Organoheterocyclic compounds | Heteroaromatic compounds | 712245824 |
| 1.26 | 111.00872 | 2-Furoate | [M-H]- | C5H4O3 | Furoic acids | C01546 | HMDB0000617 | Organoheterocyclic compounds | Furans | 3530167040 |
| 11.15 | 167.03502 | 2-Hydroxy-4-Methoxybenzoic Acid | [M-H]- | C8H8O4 | Methoxybenzoic acids and derivatives | --- | --- | Benzenoids | Benzene and substituted derivatives | 999011648 |
| 10.53 | 137.06026 | 2-Hydroxy-4-Methylbenzaldehyde | [M+Na]+ | C8H8O2 | Organooxygen compounds | --- | HMDB0032603 | Organic oxygen compounds | Organooxygen compounds | 441930400 |
| 10.51 | 131.07132 | 2-Hydroxy-4-Methylpentanoic Acid | [M-H]- | C6H12O3 | --- | --- | HMDB0000665 | Lipids and lipid-like molecules | Fatty Acyls | 659747968 |
| 13.61 | 135.0446 | 2-Hydroxyacetophenone | [M-H2O-H]- | C8H8O2 | Organooxygen compounds | C07189 | HMDB0032568 | Organic oxygen compounds | Organooxygen compounds | 355805600 |
| 5.66 | 88.11263 | 2-Methylbutylamine | [M+H]+ | C5H13N | Organonitrogen compounds | --- | HMDB0032392 | Organic nitrogen compounds | Organonitrogen compounds | 863424960 |
| 2.69 | 309.10971 | 3-(2,4-Dimethoxyphenyl)-1-(4-Hydroxyphenyl)-1-Propanone | [M+Na]+ | C17H18O4 | Retro-dihydrochalcones | --- | HMDB0254174 | Phenylpropanoids and polyketides | Linear 1,3-diarylpropanoids | 501916448 |
| 10.76 | 165.05573 | 3-(2-Hydroxyphenyl)Propanoate | [M-H]- | C9H10O3 | Phenylpropanoic acids | C01198 | HMDB0033752 | Phenylpropanoids and polyketides | Phenylpropanoic acids | 880891712 |
| 1.37 | 185.04448 | 3,4,5-Trihydroxybenzoic Acid Methyl Ester | [M+H]+ | C8H8O5 | Hydroxybenzoic acid derivatives | --- | HMDB0254590 | Benzenoids | Benzene and substituted derivatives | 388698656 |
| 10.06 | 153.01932 | 3,4-Dihydroxybenzoate | [M-H]- | C7H6O4 | Hydroxybenzoic acid derivatives | C00230 | HMDB0001856 | Benzenoids | Benzene and substituted derivatives | 703952896 |
| 1.85 | 330.05978 | 3,5-Cyclic AMP | [M+H]+ | C10H12N5O6P | 3,5-cyclic purine nucleotides | C00575 | HMDB0000058 | Nucleosides, nucleotides, and analogues | Purine nucleotides | 315213856 |
| 7.37 | 344.04013 | 3,5-Cyclic GMP | [M-H]- | C10H12N5O7P | 3,5-cyclic purine nucleotides | C00942 | HMDB0001314 | Nucleosides, nucleotides, and analogues | Purine nucleotides | 195272272 |
| 9.84 | 297.10971 | 3,5-Dihydroxy-3,4-Dimethoxydihydrostilbene | [M+Na]+ | C16H18O4 | Stilbenes | --- | --- | Phenylpropanoids and polyketides | Stilbenes | 162258752 |
| 10.60 | 183.06519 | 3,5-Di-Me Ether-3,4,5-Trihydroxybenzaldehyde | [M+H]+ | C9H10O4 | Methoxyphenols | --- | HMDB0258653 | Benzenoids | Phenols | 1213665920 |
| 2.41 | 102.05495 | 3-Azetidinecarboxylic Acid | [M+H]+ | C4H7NO2 | Azetidines | --- | HMDB0248797 | Organoheterocyclic compounds | Azetidines | 912419584 |
| 4.25 | 138.09138 | 3-Dimethylaminophenol | [M+H]+ | C8H11NO | Tertiary amines | --- | --- | Organic nitrogen compounds | Organonitrogen compounds | 674375360 |
| 1.65 | 127.03898 | 3-Hydroxy-2-Methyl-4-Pyrone | [M+H]+ | C6H6O3 | --- | C11918 | HMDB0030776 | Organoheterocyclic compounds | Pyrans | 1913654016 |
| 9.84 | 107.049 | 3-Hydroxybenzyl Alcohol | [M+H-H2O]+ | C7H8O2 | Benzyl alcohols | C03351 | HMDB0059712 | Benzenoids | Benzene and substituted derivatives | 540112384 |
| 10.75 | 195.06631 | 3-Methoxy-4-Hydroxy-Ethyl Benzoate | [M-H]- | C10H12O4 | Methoxybenzoic acids and derivatives | --- | HMDB0303913 | Benzenoids | Benzene and substituted derivatives | 378648032 |
| 9.87 | 447.12857 | 3-Methoxypuerarin | [M+H]+ | C22H22O10 | Isoflavonoid C-glycosides | --- | HMDB0246100 | Phenylpropanoids and polyketides | Isoflavonoids | 170784576 |
| 10.60 | 153.05458 | 3-Methylsalicylate | [M+H]+ | C8H8O3 | Hydroxybenzoic acid derivatives | C14088 | HMDB0002390 | Benzenoids | Benzene and substituted derivatives | 960072384 |
| 10.46 | 285.07578 | 4,7-Dihydroxy-5-Methoxyisoflavone | [M+H]+ | C16H12O5 | Isoflavones | --- | HMDB0301940 | Phenylpropanoids and polyketides | Isoflavonoids | 447045952 |
| 1.71 | 104.07058 | 4-Aminobutanoate - 70.0 Ev | [M+H]+ | C4H9NO2 | Amino acids and derivatives | C00334 | HMDB0000112 | Organic acids and derivatives | Carboxylic acids and derivatives | 1091414272 |
| 10.60 | 152.0706 | 4-Aminophenylacetic Acid | [M+H]+ | C8H9NO2 | Benzene and substituted derivatives | --- | HMDB0246358 | Benzenoids | Benzene and substituted derivatives | 434839776 |
| 1.32 | 119.03443 | 4-Deoxyerythronic Acid | [M-H]- | C4H8O4 | Organooxygen compounds | --- | HMDB0000498 | Organic oxygen compounds | Organooxygen compounds | 1182778368 |
| 9.59 | 150.09138 | 4-Dimethylaminobenzaldehyde | [M+H]+ | C9H11NO | Benzoyl derivatives | --- | HMDB0246303 | Benzenoids | Benzene and substituted derivatives | 403844032 |
| 2.15 | 146.09238 | 4-Guanidinobutanoate | [M+H]+ | C5H11N3O2 | Amino acids and derivatives | C01035 | HMDB0003464 | Organic acids and derivatives | Carboxylic acids and derivatives | 4661600256 |
| 10.46 | 123.04408 | 4-Hydroxybenzaldehyde - 50.0 Ev | [M+H]+ | C7H6O2 | Aldehydes | C00633 | HMDB0011718 | Organic oxygen compounds | Organooxygen compounds | 982058432 |
| 11.19 | 137.02441 | 4-Hydroxybenzoate | [M-H]- | C7H6O3 | Hydroxybenzoic acid derivatives | C00156 | HMDB0000500 | Benzenoids | Benzene and substituted derivatives | 5411691008 |
| 9.97 | 149.05968 | 4-Hydroxycinnamyl Aldehyde | [M+H]+ | C9H8O2 | Cinnamaldehydes | C05608 | HMDB0040986 | Phenylpropanoids and polyketides | Cinnamaldehydes | 2900427520 |
| 10.71 | 135.04401 | 4-Methoxybenzoate | [M+H-H2O]+ | C8H8O3 | Methoxybenzoic acids and derivatives | C02519 | HMDB0001101 | Benzenoids | Benzene and substituted derivatives | 1247934976 |
| 9.97 | 177.05458 | 4-Methylumbelliferone | [M+H]+ | C10H8O3 | 7-hydroxycoumarins | C03081 | HMDB0059622 | Phenylpropanoids and polyketides | Coumarins and derivatives | 6387907072 |
| 2.85 | 140.03418 | 4-Nitrophenol | [M+H]+ | C6H5NO3 | Nitrophenols | C00870 | HMDB0001232 | Benzenoids | Phenols | 317863872 |
| 10.39 | 167.10667 | 4-Tert-Butylcatechol | [M+H]+ | C10H14O2 | Phenylpropanes | --- | HMDB0246584 | Benzenoids | Benzene and substituted derivatives | 750900800 |
| 9.66 | 144.04778 | 5-(2-Hydroxyethyl)-4-Methylthiazole | [M+H]+ | C6H9NOS | 4,5-disubstituted thiazoles | C04294 | HMDB0032985 | Organoheterocyclic compounds | Azoles | 1071487168 |
| 9.73 | 148.11263 | 5,6,7,8-Tetrahydro-4-Methylquinoline | [M+CH3OH+H]+ | C10H13N | Quinolines and derivatives | --- | HMDB0029709 | Organoheterocyclic compounds | Quinolines and derivatives | 3101056256 |
| 11.40 | 205.05061 | 5,7-Dihydroxy-2,8-Dimethyl-4H-Chromen-4-One | [M-H]- | C11H10O4 | Chromones | --- | HMDB0029472 | Organoheterocyclic compounds | Benzopyrans | 279476800 |
| 10.23 | 367.10342 | 5-O-Feruloylquinic Acid | [M-H]- | C17H20O9 | Cyclic alcohols and derivatives | C02572 | HMDB0030669 | Organic oxygen compounds | Organooxygen compounds | 398847808 |
| 2.65 | 128.03532 | 5-Oxo-D-Proline | [M-H]- | C5H7NO3 | Amino acids and derivatives | C01879 | HMDB0000267 | Organic acids and derivatives | Carboxylic acids and derivatives | 24167675904 |
| 1.88 | 128.03532 | 5-Oxoproline | [M-H]- | C5H7NO3 | Amino acids and derivatives | C01879 | HMDB0000267 | Organic acids and derivatives | Carboxylic acids and derivatives | 28512718848 |
| 10.10 | 353.08725 | 5Z-Caffeoylquinic Acid | [M-H2O-H]- | C16H18O9 | Organooxygen compounds | C17147 | HMDB0040690 | Organic oxygen compounds | Organooxygen compounds | 10025742336 |
| 9.85 | 245.18762 | 6-Methyl-2-(4-Methyl-3-Cyclohexen-1-Yl)-5-Hepten-2-Ol | [M+Na]+ | C15H26O | Sesquiterpenoids | --- | HMDB0248190 | Lipids and lipid-like molecules | Prenol lipids | 322311328 |
| 12.03 | 309.20712 | 6-Methylgingediol | [M-H]- | C18H30O4 | Benzene and substituted derivatives | --- | HMDB0303099 | Benzenoids | Benzene and substituted derivatives | 656936448 |
| 11.89 | 339.12381 | 6-Prenylnaringenin | [M-H]- | C20H20O5 | 6-prenylated flavanones | C09832 | HMDB0037247 | Phenylpropanoids and polyketides | Flavonoids | 171888176 |
| 11.91 | 321.11322 | 7,4-Dihydroxy-3-(Gamma,Gamma-Dimethylallyl)Isoflavone | [M-H]- | C20H18O4 | Isoflavones | --- | HMDB0255518 | Phenylpropanoids and polyketides | Isoflavonoids | 764437376 |
| 10.62 | 255.06519 | 7,4-Dihydroxyflavone | [M+H]+ | C15H10O4 | Flavones | C12123 | HMDB0247290 | Phenylpropanoids and polyketides | Flavonoids | 498123712 |
| 12.11 | 313.07172 | 7-Methylcapillarisin | [M-H]- | C17H14O6 | 7-O-methylated flavonoids | C17785 | HMDB0250276 | Phenylpropanoids and polyketides | Flavonoids | 561520512 |
| 10.72 | 261.11218 | 8-(2-Hydroxy-3-Methylbut-3-En-1-Yl)-7-Methoxy-2H-Chromen-2-One | [M+H]+ | C15H16O4 | Coumarins and derivatives | --- | HMDB0030854 | Phenylpropanoids and polyketides | Coumarins and derivatives | 322561952 |
| 11.03 | 263.12881 | Abscisic Acid | [M-H]- | C15H20O4 | Abscisic acids and derivatives | C06082 | HMDB0036093 | Lipids and lipid-like molecules | Prenol lipids | 731338432 |
| 2.58 | 152.07059 | Acetaminophen | [M+H]+ | C8H9NO2 | 1-hydroxy-2-unsubstituted benzenoids | C06804 | HMDB0001859 | Benzenoids | Phenols | 2102422912 |
| 3.88 | 85.0295 | Acetoacetaldehyde | [M-H2O-H]- | C4H6O2 | Organooxygen compounds | --- | HMDB0247909 | Organic oxygen compounds | Organooxygen compounds | 517672416 |
| 4.28 | 86.06004 | Acetone Cyanohydrin | [M+H]+ | C4H7NO | Organooxygen compounds | C02659 | HMDB0060427 | Organic oxygen compounds | Organooxygen compounds | 9724127232 |
| 10.47 | 195.06631 | Acetosyringone | [M-H]- | C10H12O4 | Ketones | C10664 | --- | Organic oxygen compounds | Organooxygen compounds | 240361472 |
| 2.19 | 136.06178 | Adenine | [M+H]+ | C5H5N5 | 6-aminopurines | C00147 | HMDB0000034 | Organoheterocyclic compounds | Imidazopyrimidines | 35642908672 |
| 8.95 | 268.10397 | Adenosine | [M+H]+ | C10H13N5O4 | Purine nucleosides | C00212 | HMDB0000050 | Nucleosides, nucleotides, and analogues | Purine nucleosides | 3204207872 |
| 6.28 | 330.05978 | Adenosine 2,3-Cyclic Phosphate | [M+H]+ | C10H12N5O6P | --- | --- | HMDB0011616 | Organic oxygen compounds | Organooxygen compounds | 374106336 |
| 10.01 | 481.17038 | Albiflorin | [M+H]+ | C23H28O11 | Terpene glycosides | C17457 | HMDB0248116 | Lipids and lipid-like molecules | Prenol lipids | 1160302080 |
| 10.11 | 370.16489 | Allocryptopine | [M+H]+ | C21H23NO5 | Protopine alkaloids | C02134 | HMDB0302683 | Alkaloids and derivatives | Protopine alkaloids | 129398472 |
| 9.92 | 341.10892 | Alpha,Alpha-Trehalose | [M-H]- | C12H22O11 | Glycosyl compounds | C01083 | HMDB0000975 | Organic oxygen compounds | Organooxygen compounds | 135524192 |
| 1.14 | 151.03899 | Alpha-Oxo-Benzeneacetic Acid | [M+H]+ | C8H6O3 | Benzoyl derivatives | C02137 | HMDB0001587 | Benzenoids | Benzene and substituted derivatives | 1436725504 |
| 4.57 | 348.07037 | AMP | [M+H]+ | C10H14N5O7P | Purine ribonucleoside monophosphates | C00020 | HMDB0000045 | Nucleosides, nucleotides, and analogues | Purine nucleotides | 103982072 |
| 3.25 | 158.09402 | Amphetamine | [M+Na]+ | C9H13N | Amphetamines and derivatives | C07514 | HMDB0014328 | Benzenoids | Benzene and substituted derivatives | 6405211648 |
| 10.02 | 458.16568 | Amygdalin | [M+H]+ | C20H27NO11 | Glycosyl compounds | C08325 | HMDB0035030 | Organic oxygen compounds | Organooxygen compounds | 104248912 |
| 5.70 | 163.12299 | Anabasine | [M+H]+ | C10H14N2 | Alkaloids and derivatives | C06180 | HMDB0004350 | Alkaloids and derivatives | --- | 1013985088 |
| 11.19 | 107.04969 | Anisole | [M-H]- | C7H8O | Phenol ethers | C01403 | HMDB0033895 | Benzenoids | Phenol ethers | 179212352 |
| 10.68 | 445.07761 | Apigenin-7-O-Glucuronide | [M-H]- | C21H18O11 | Flavonoid O-glycosides | --- | HMDB0240480 | Phenylpropanoids and polyketides | Flavonoids | 1815645184 |
| 0.95 | 165.03992 | Arabinonic Acid | [M-H]- | C5H10O6 | Organooxygen compounds | C00878 | HMDB0000539 | Organic oxygen compounds | Organooxygen compounds | 4101878784 |
| 1.38 | 175.05772 | Arabitol | [M+Na]+ | C5H12O5 | Sugar alcohols | C00474 | HMDB0000508 | Organic oxygen compounds | Organooxygen compounds | 402482048 |
| 10.73 | 151.06122 | Arabitol(D) | [M-H]- | C5H12O5 | Sugar alcohols | C01904 | HMDB0000568 | Organic oxygen compounds | Organooxygen compounds | 430129600 |
| 3.28 | 156.10188 | Arecoline - 40.0 Ev | [M+H]+ | C8H13NO2 | Alkaloids and derivatives | C10129 | HMDB0030353 | Alkaloids and derivatives | --- | 1103778048 |
| 2.50 | 305.13593 | Artemisinin | [M+Na]+ | C15H22O5 | Terpene lactones | C09538 | --- | Lipids and lipid-like molecules | Prenol lipids | 1333885312 |
| 1.68 | 133.06078 | Asparagine | [M+H]+ | C4H8N2O3 | --- | C16438 | HMDB0000168 | Organic acids and derivatives | Carboxylic acids and derivatives | 529620128 |
| 10.31 | 449.10892 | Astilbin | [M-H]- | C21H22O11 | Flavonoid O-glycosides | C17449 | HMDB0033850 | Phenylpropanoids and polyketides | Flavonoids | 3719324928 |
| 10.68 | 187.09763 | Azelaic Acid | [M-H]- | C9H16O4 | Medium-chain fatty acids | C08261 | HMDB0000784 | Lipids and lipid-like molecules | Fatty Acyls | 2699770624 |
| 11.46 | 269.04553 | Baicalein | [M-H]- | C15H10O5 | Flavones | C10023 | --- | Phenylpropanoids and polyketides | Flavonoids | 4958194688 |
| 10.39 | 447.09219 | Baicalin | [M+H]+ | C21H18O11 | Flavonoid O-glycosides | C10025 | HMDB0041832 | Phenylpropanoids and polyketides | Flavonoids | 24901371904 |
| 1.65 | 128.0706 | Baikiain | [M+H]+ | C6H9NO2 | Carboxylic acids and derivatives | C08268 | HMDB0302856 | Organic acids and derivatives | Carboxylic acids and derivatives | 417143936 |
| 13.57 | 125.02442 | Benzene-1,2,4-Triol | [M-H]- | C6H6O3 | Hydroxyquinols and derivatives | C02814 | --- | Benzenoids | Phenols | 506622720 |
| 9.97 | 118.06567 | Benzeneacetonitrile | [M+H]+ | C8H7N | Benzene and substituted derivatives | C16074 | HMDB0034171 | Benzenoids | Benzene and substituted derivatives | 414480928 |
| 10.62 | 121.02952 | Benzoate | [M-H]- | C7H6O2 | Benzoic acids | C00180 | HMDB0001870 | Benzenoids | Benzene and substituted derivatives | 2135194880 |
| 6.67 | 119.04969 | Benzofuran | [M+H]+ | C8H6O | Benzofurans | C14512 | HMDB0032929 | Organoheterocyclic compounds | Benzofurans | 370941248 |
| 10.27 | 336.12357 | Berberine | [M]+ | C20H18NO4 | Protoberberine alkaloids and derivatives | C00757 | HMDB0003409 | Alkaloids and derivatives | Protoberberine alkaloids and derivatives | 54154244096 |
| 0.95 | 215.03502 | Bergapten | [M-H]- | C12H8O4 | Psoralens | C01557 | HMDB0030637 | Phenylpropanoids and polyketides | Coumarins and derivatives | 9966279680 |
| 1.43 | 118.08628 | Betaine | [M+H]+ | C5H11NO2 | Amino acids and derivatives | C00719 | HMDB0000043 | Organic acids and derivatives | Carboxylic acids and derivatives | 2371123712 |
| 11.00 | 283.06122 | Biochanin A | [M-H]- | C16H12O5 | 4-O-methylated isoflavonoids | C00814 | HMDB0002338 | Phenylpropanoids and polyketides | Isoflavonoids | 566628352 |
| 9.81 | 328.15427 | Boldine | [M+H]+ | C19H21NO4 | Aporphines | C09365 | --- | Alkaloids and derivatives | Aporphines | 2202316032 |
| 10.20 | 163.039 | Caffeate | [M+H-H2O]+ | C9H8O4 | Hydroxycinnamic acids | C01197 | HMDB0001964 | Phenylpropanoids and polyketides | Cinnamic acids and derivatives | 330560352 |
| 9.87 | 163.039 | Caffeicacid | [M+H-H2O]+ | C9H8O4 | Hydroxycinnamic acids | --- | HMDB0003501 | Phenylpropanoids and polyketides | Cinnamic acids and derivatives | 596439104 |
| 10.43 | 447.12857 | Calycosin-7-O-Beta-D-Glucoside | [M+H]+ | C22H22O10 | Isoflavonoid O-glycosides | C10509 | HMDB0033987 | Phenylpropanoids and polyketides | Isoflavonoids | 35413152 |
| 1.31 | 227.11388 | Carnosine | [M+H]+ | C9H14N4O3 | Hybrid peptides | C00386 | HMDB0000033 | Organic acids and derivatives | Peptidomimetics | 48337388 |
| 4.27 | 407.11951 | Catalpol | [M+FA-H]- | C15H22O10 | Glycosyl compounds | C09773 | HMDB0242754 | Organic oxygen compounds | Organooxygen compounds | 1717443456 |
| 10.05 | 109.02952 | Catechol | [M-H]- | C6H6O2 | Catechols | C00090 | HMDB0000957 | Benzenoids | Phenols | 355405152 |
| 9.60 | 316.15427 | Cephalotaxine | [M+H]+ | C18H21NO4 | Cephalotaxus alkaloids | C10580 | HMDB0253207 | Alkaloids and derivatives | Cephalotaxus alkaloids | 194440656 |
| 10.54 | 473.07251 | Chicoric Acid | [M-H]- | C22H18O12 | Tetracarboxylic acids and derivatives | C10437 | HMDB0002375 | Organic acids and derivatives | Carboxylic acids and derivatives | 168777872 |
| 1.41 | 104.10751 | Choline | [M]+ | C5H14NO | Cholines | C00114 | HMDB0000097 | Organic nitrogen compounds | Organonitrogen compounds | 45128757248 |
| 10.22 | 307.11758 | Cimifugin | [M+H]+ | C16H18O6 | Chromones | C09000 | HMDB0250254 | Organoheterocyclic compounds | Benzopyrans | 89811632128 |
| 9.92 | 469.17038 | Cimifugin, (S)-Form, 1-O-Beta-D-Glucopyranoside | [M+H]+ | C22H28O11 | Furanochromones | --- | HMDB0256772 | Organoheterocyclic compounds | Benzopyrans | 15866455040 |
| 3.33 | 173.00912 | Cis-Aconitate | [M-H]- | C6H6O6 | Tricarboxylic acids and derivatives | C00417 | HMDB0000072 | Organic acids and derivatives | Carboxylic acids and derivatives | 2747885056 |
| 10.36 | 165.05518 | Cis-P-Coumaric Acid | [M+H]+ | C9H8O3 | Cinnamic acids and derivatives | C00811 | HMDB0030677 | Phenylpropanoids and polyketides | Cinnamic acids and derivatives | 306830304 |
| 1.23 | 129.01932 | Citraconic Acid | [M-H]- | C5H6O4 | Branched fatty acids | C02226 | HMDB0000634 | Lipids and lipid-like molecules | Fatty Acyls | 526523776 |
| 2.47 | 191.01971 | Citrate | [M-H]- | C6H8O7 | Tricarboxylic acids and derivatives | C00158 | HMDB0000094 | Organic acids and derivatives | Carboxylic acids and derivatives | 1.11477E+11 |
| 6.64 | 365.12073 | Coniferin | [M+Na]+ | C16H22O8 | Phenolic glycosides | C00761 | HMDB0013682 | Organic oxygen compounds | Organooxygen compounds | 97063832 |
| 9.71 | 179.07028 | Coniferyl Aldehyde | [M+H]+ | C10H10O3 | MethoxyphenolsInChIKey | C02666 | HMDB0141782 | Benzenoids | Phenols | 277358176 |
| 3.48 | 274.09103 | Cordycepin | [M+Na]+ | C10H13N5O3 | Purine 3-deoxyribonucleosides | C08431 | HMDB0250451 | Nucleosides, nucleotides, and analogues | Purine nucleosides | 3575035904 |
| 10.64 | 284.12808 | Coumaroyl Tyramine | [M+H]+ | C17H17NO3 | Coumaric acids and derivatives | --- | HMDB0304448 | Phenylpropanoids and polyketides | Cinnamic acids and derivatives | 346878304 |
| 10.62 | 235.16928 | Curcumenol | [M+H]+ | C15H22O2 | Guaianes | C16942 | HMDB0033960 | Lipids and lipid-like molecules | Prenol lipids | 661370496 |
| 2.26 | 244.09277 | Cytidine - 70.0 Ev | [M+H]+ | C9H13N3O5 | Pyrimidine nucleosides | C00475 | HMDB0000089 | Nucleosides, nucleotides, and analogues | Pyrimidine nucleosides | 3353143808 |
| 7.10 | 112.05058 | Cytosine | [M+H]+ | C4H5N3O | Pyrimidones | C00380 | HMDB0000630 | Organoheterocyclic compounds | Diazines | 271953152 |
| 2.26 | 112.05058 | Cytosine - 50.0 Ev | [M+H]+ | C4H5N3O | Pyrimidones | C00380 | HMDB0000630 | Organoheterocyclic compounds | Diazines | 4721590272 |
| 6.66 | 309.09442 | D-(-)-Salicin | [M+Na]+ | C13H18O7 | Glycosyl compounds | --- | --- | Organic oxygen compounds | Organooxygen compounds | 146229280 |
| 10.05 | 415.10342 | Daidzein-8-C-Glucoside | [M-H]- | C21H20O9 | Isoflavonoid C-glycosides | C10524 | HMDB0240265 | Phenylpropanoids and polyketides | Isoflavonoids | 182853776 |
| 1.01 | 149.045 | D-Arabinose | [M-H]- | C5H10O5 | Organooxygen compounds | C00216 | HMDB0029942 | Organic oxygen compounds | Organooxygen compounds | 448681248 |
| 2.74 | 203.01971 | Daucic Acid | [M-H]- | C7H8O7 | Beta hydroxy acids and derivatives | --- | HMDB0031665 | Organic acids and derivatives | Hydroxy acids and derivatives | 2450943232 |
| 10.65 | 247.09648 | Decursinol | [M+H]+ | C14H14O4 | Linear pyranocoumarins | C09259 | HMDB0033914 | Phenylpropanoids and polyketides | Coumarins and derivatives | 740465984 |
| 10.32 | 366.16943 | Dehydrocorydaline | [M]+ | C22H24NO4 | Protoberberine alkaloids and derivatives | C17790 | --- | Alkaloids and derivatives | Protoberberine alkaloids and derivatives | 1043575296 |
| 10.16 | 302.12878 | Dehydroevodiamine | [M+H]+ | C19H15N3O | Quinazolines | --- | HMDB0250954 | Organoheterocyclic compounds | Diazanaphthalenes | 1152172032 |
| 0.95 | 195.05103 | D-Gluconic Acid | [M-H]- | C6H12O7 | Sugar acids and derivatives | C00257 | HMDB0000625 | Organic oxygen compounds | Organooxygen compounds | 10029650944 |
| 1.44 | 180.08669 | D-Glucosamine | [M+H]+ | C6H13NO5 | Monosaccharides | C00329 | HMDB0001514 | Organic oxygen compounds | Organooxygen compounds | 260389456 |
| 0.95 | 193.03532 | D-Glucuronate | [M-H]- | C6H10O7 | Sugar acids and derivatives | C00191 | HMDB0000127 | Organic oxygen compounds | Organooxygen compounds | 1064683200 |
| 13.60 | 193.03532 | D-Glucuronic Acid | [M-H]- | C6H10O7 | Sugar acids and derivatives | C16245 | HMDB0000127 | Organic oxygen compounds | Organooxygen compounds | 605141248 |
| 1.30 | 105.01932 | D-Glyceric Acid | [M-H]- | C3H6O4 | Sugar acids and derivatives | C00258 | HMDB0000139 | Organic oxygen compounds | Organooxygen compounds | 480895136 |
| 11.97 | 223.09703 | Dhelwangin | [M-H]- | C12H16O4 | Organooxygen compounds | --- | HMDB0030703 | Organic oxygen compounds | Organooxygen compounds | 292202496 |
| 1.44 | 87.04408 | Diacetyl | [M+H]+ | C4H6O2 | Ketones | C00741 | HMDB0003407 | Organic oxygen compounds | Organooxygen compounds | 133236392 |
| 9.84 | 130.15903 | Dibutylamine | [M+H]+ | C8H19N | Organonitrogen compounds | --- | HMDB0251174 | Organic nitrogen compounds | Organonitrogen compounds | 187787664 |
| 10.25 | 308.22198 | Dihydrocapsaicin | [M+H]+ | C18H29NO3 | Methoxyphenols | C16952 | HMDB0038457 | Benzenoids | Phenols | 170405344 |
| 10.30 | 289.07068 | Dihydrokaempferol | [M+H]+ | C15H12O6 | Flavanones | C00974 | HMDB0030847 | Phenylpropanoids and polyketides | Flavonoids | 330141504 |
| 2.04 | 79.02118 | Dimethyl Sulfoxide | [M+H]+ | C2H6OS | Sulfoxides | C11143 | HMDB0002151 | Organosulfur compounds | Sulfoxides | 850417664 |
| 11.45 | 299.05612 | Diosmetin | [M-H]- | C16H12O6 | 4-O-methylated flavonoids | C10038 | HMDB0029676 | Phenylpropanoids and polyketides | Flavonoids | 1115746432 |
| 1.22 | 147.11278 | Dl-Lysine | [M+H]+ | C6H14N2O2 | Amino acids and derivatives | C00047 | HMDB0000182 | Organic acids and derivatives | Carboxylic acids and derivatives | 130890912 |
| 0.91 | 104.03532 | Dl-Serine | [M-H]- | C3H7NO3 | Amino acids and derivatives | C00065 | HMDB0003406 | Organic acids and derivatives | Carboxylic acids and derivatives | 120151192 |
| 1.34 | 162.076 | D-Mannosamine | [M-H2O+H]+ | C6H13NO5 | --- | C03570 | --- | --- | --- | 151797120 |
| 10.54 | 136.076 | Dopamine | [M+H-H2O]+ | C8H11NO2 | Catechols | C03758 | HMDB0000073 | Benzenoids | Phenols | 327659584 |
| 9.93 | 218.10342 | D-Pantothenic Acid | [M-H]- | C9H17NO5 | Amino acids and derivatives | --- | HMDB0250782 | Organic acids and derivatives | Carboxylic acids and derivatives | 179658096 |
| 1.64 | 130.08681 | D-Pipecolic Acid | [M+H]+ | C6H11NO2 | Carboxylic acids and derivatives | --- | HMDB0005960 | Organic acids and derivatives | Carboxylic acids and derivatives | 3043285504 |
| 1.32 | 131.03441 | D-Ribose | [M-H2O-H]- | C5H10O5 | Monosaccharides | C00121 | HMDB0000283 | Organic oxygen compounds | Organooxygen compounds | 340912544 |
| 10.33 | 300.99902 | Ellagic Acid | [M-H]- | C14H6O8 | Hydrolyzable tannins | C10788 | HMDB0002899 | Phenylpropanoids and polyketides | Tannins | 179152880 |
| 10.30 | 269.10492 | Ellipticine | [M+Na]+ | C17H14N2 | Carbazoles | C09154 | HMDB0251751 | Organoheterocyclic compounds | Indoles and derivatives | 144133104 |
| 13.43 | 293.17581 | Embelin | [M-H]- | C17H26O4 | Ketones | C10342 | HMDB0251767 | Organic oxygen compounds | Organooxygen compounds | 115958144 |
| 13.54 | 269.04553 | Emodin | [M-H]- | C15H10O5 | Hydroxyanthraquinones | C10343 | HMDB0035214 | Benzenoids | Anthracenes | 1205242880 |
| 9.73 | 166.12268 | Ephedrine | [M+H]+ | C10H15NO | Phenylpropanes | C01575 | HMDB0015451 | Benzenoids | Benzene and substituted derivatives | 2801544448 |
| 10.24 | 339.07211 | Esculin | [M-H]- | C15H16O9 | Coumarin glycosides | C09264 | HMDB0030820 | Phenylpropanoids and polyketides | Coumarins and derivatives | 298126880 |
| 3.16 | 142.08627 | Ethosuximide | [M+H]+ | C7H11NO2 | Pyrrolidine-2-ones | C07505 | HMDB0014731 | Organoheterocyclic compounds | Pyrrolidines | 289132864 |
| 9.96 | 197.04552 | Ethyl 3,4,5-Trihydroxybenzoate | [M-H]- | C9H10O5 | Hydroxybenzoic acid derivatives | --- | HMDB0033836 | Benzenoids | Benzene and substituted derivatives | 408572864 |
| 10.22 | 165.05573 | Ethyl 4-Hydroxybenzoate | [M-H]- | C9H10O3 | Benzoic acid esters | --- | HMDB0032573 | Benzenoids | Benzene and substituted derivatives | 9660268544 |
| 9.95 | 195.06519 | Ferulate | [M+H]+ | C10H10O4 | Hydroxycinnamic acids | C01494 | HMDB0000954 | Phenylpropanoids and polyketides | Cinnamic acids and derivatives | 10217072640 |
| 11.63 | 267.06631 | Formononetin | [M-H]- | C16H12O4 | 4-O-methylated isoflavonoids | C00858 | HMDB0005808 | Phenylpropanoids and polyketides | Isoflavonoids | 1076882560 |
| 1.16 | 115.00372 | Fumarate | [M-H]- | C4H4O4 | Dicarboxylic acids and derivatives | C00122 | HMDB0000134 | Organic acids and derivatives | Carboxylic acids and derivatives | 2036670976 |
| 0.94 | 181.07172 | Galactitol | [M-H]- | C6H14O6 | Sugar alcohols | C01489 | HMDB0250766 | Organic oxygen compounds | Organooxygen compounds | 4616962560 |
| 5.08 | 169.01422 | Gallate | [M-H]- | C7H6O5 | Hydroxybenzoic acid derivatives | C01424 | HMDB0005807 | Benzenoids | Benzene and substituted derivatives | 5070977536 |
| 4.03 | 331.06702 | Gallic Acid Hexoside | [M-H]- | C13H16O10 | Tannins | C01158 | HMDB0038728 | Phenylpropanoids and polyketides | Tannins | 92218040 |
| 10.29 | 631.16681 | Galloylpaeoniflorin | [M-H]- | C30H32O15 | Terpene glycosides | --- | --- | Lipids and lipid-like molecules | Prenol lipids | 81674576 |
| 10.22 | 433.13516 | Geniposide | [M+HCOO]- | C17H24O10 | Iridoid O-glycosides | C09781 | HMDB0252679 | Lipids and lipid-like molecules | Prenol lipids | 304757376 |
| 10.39 | 271.06009 | Genistein | [M+H]+ | C15H10O5 | Isoflavones | C06563 | HMDB0003217 | Phenylpropanoids and polyketides | Isoflavonoids | 1506622080 |
| 10.34 | 433.11288 | Genistein 7-O-Beta-D-Glucoside | [M+H]+ | C21H20O10 | Isoflavonoid O-glycosides | C09126 | HMDB0033988 | Phenylpropanoids and polyketides | Isoflavonoids | 312325856 |
| 10.51 | 176.07059 | Gentianine | [M+H]+ | C10H9NO2 | Pyranopyridines | C06525 | HMDB0303030 | Organoheterocyclic compounds | Pyranopyridines | 1791101056 |
| 10.15 | 401.10895 | Gentiopicroside | [M+HCOO]- | C16H20O9 | Glycosyl compounds | C09782 | HMDB0252696 | Organic oxygen compounds | Organooxygen compounds | 5953891840 |
| 12.04 | 829.49548 | Ginsenoside Rg3(R-Form) | [M+FA-H]- | C42H72O13 | Triterpenoids | C20778 | HMDB0039546 | Lipids and lipid-like molecules | Prenol lipids | 74477600 |
| 10.76 | 431.09781 | Glucoemodin | [M-H]- | C21H20O10 | Anthracenes | --- | HMDB0038887 | Benzenoids | Anthracenes | 2595624704 |
| 9.96 | 131.03502 | Glutarate | [M-H]- | C5H8O4 | Dicarboxylic acids and derivatives | C00489 | HMDB0000661 | Organic acids and derivatives | Carboxylic acids and derivatives | 1639241856 |
| 0.95 | 89.02442 | Glyceraldehyde | [M-H]- | C3H6O3 | Monosaccharides | C02154 | HMDB0001051 | Organic oxygen compounds | Organooxygen compounds | 2564193280 |
| 0.95 | 245.04263 | Glycerophosphoglycerol | [M-H]- | C6H15O8P | Organic phosphoric acids and derivatives | C03274 | HMDB0240316 | Organic acids and derivatives | Organic phosphoric acids and derivatives | 233944144 |
| 10.02 | 447.12857 | Glycitin | [M+H]+ | C22H22O10 | Isoflavonoid O-glycosides | C16195 | HMDB0002219 | Phenylpropanoids and polyketides | Isoflavonoids | 393295456 |
| 11.32 | 821.39655 | Glycyrrhizic Acid | [M-H]- | C42H62O16 | Triterpene glycosides | C02284 | HMDB0029843 | Lipids and lipid-like molecules | Prenol lipids | 1199440128 |
| 12.66 | 317.21167 | Grandiflorolic Acid | [M-H]- | C20H30O3 | Prenol lipids | C17956 | HMDB0036930 | Lipids and lipid-like molecules | Prenol lipids | 273686272 |
| 9.57 | 152.05669 | Guanine | [M+H]+ | C5H5N5O | Purines and purine derivatives | C00242 | HMDB0000132 | Organoheterocyclic compounds | Imidazopyrimidines | 1420899072 |
| 9.79 | 282.08441 | Guanosine | [M-H]- | C10H13N5O5 | Purine nucleosides | C00387 | HMDB0000133 | Nucleosides, nucleotides, and analogues | Purine nucleosides | 176145104 |
| 9.57 | 284.09897 | Guanosine - 50.0 Ev | [M+H]+ | C10H13N5O5 | Purine nucleosides | C00387 | HMDB0000133 | Nucleosides, nucleotides, and analogues | Purine nucleosides | 1625605504 |
| 10.37 | 495.18607 | Harpagoside | [M+H]+ | C24H30O11 | Iridoid O-glycosides | C09783 | HMDB0253053 | Lipids and lipid-like molecules | Prenol lipids | 1180923776 |
| 10.15 | 611.19708 | Hesperidin | [M+H]+ | C28H34O15 | Flavonoid O-glycosides | C09755 | HMDB0003265 | Phenylpropanoids and polyketides | Flavonoids | 73060240 |
| 4.11 | 112.08688 | Histamine | [M+H]+ | C5H9N3 | Primary amines | C00388 | HMDB0000870 | Organic nitrogen compounds | Organonitrogen compounds | 745714688 |
| 3.41 | 112.08688 | Histamine - 40.0 Ev | [M+H]+ | C5H9N3 | Primary amines | C00388 | HMDB0000870 | Organic nitrogen compounds | Organonitrogen compounds | 286412800 |
| 0.90 | 154.06223 | Histidine | [M-H]- | C6H9N3O2 | Amino acids and derivatives | C00135 | HMDB0000177 | Organic acids and derivatives | Carboxylic acids and derivatives | 127075912 |
| 1.45 | 189.13458 | Homoarginine | [M+H]+ | C7H16N4O2 | Amino acids and derivatives | C01924 | HMDB0000670 | Organic acids and derivatives | Carboxylic acids and derivatives | 555124096 |
| 10.04 | 165.05499 | Homovanillate | [M+H-H2O]+ | C9H10O4 | Methoxyphenols | C05582 | HMDB0000118 | Benzenoids | Phenols | 374021536 |
| 7.01 | 166.12268 | Hordenine | [M+H]+ | C10H15NO | Phenethylamines | C06199 | HMDB0004366 | Benzenoids | Benzene and substituted derivatives | 286308000 |
| 2.53 | 111.04408 | Hydroquinone | [M+H]+ | C6H6O2 | Hydroquinones | C00530 | HMDB0002434 | Benzenoids | Phenols | 234211664 |
| 2.82 | 247.14407 | Hypaphorine | [M+H]+ | C14H18N2O2 | Amino acids and derivatives | --- | --- | Organic acids and derivatives | Carboxylic acids and derivatives | 236637392 |
| 10.26 | 463.08823 | Hyperoside | [M-H]- | C21H20O12 | Flavonoid O-glycosides | C10073 | HMDB0030775 | Phenylpropanoids and polyketides | Flavonoids | 279381824 |
| 0.95 | 135.03122 | Hypoxanthine | [M-H]- | C5H4N4O | Purinones | C00262 | HMDB0000157 | Organoheterocyclic compounds | Imidazopyrimidines | 2970886400 |
| 3.16 | 137.04578 | Hypoxanthine - 60.0 Ev | [M+H]+ | C5H4N4O | Purinones | C00262 | HMDB0000157 | Organoheterocyclic compounds | Imidazopyrimidines | 1221128576 |
| 10.04 | 430.33157 | Imperialine | [M+H]+ | C27H43NO3 | Cerveratrum-type alkaloids | C10808 | HMDB0256206 | Lipids and lipid-like molecules | Steroids and steroid derivatives | 452179936 |
| 10.30 | 133.06534 | Indanone | [M+H]+ | C9H8O | Indanes | C01504 | HMDB0059602 | Benzenoids | Indanes | 578537216 |
| 10.72 | 162.09138 | Indole-3-Ethanol | [M+H]+ | C10H11NO | 3-alkylindoles | C00955 | HMDB0003447 | Organoheterocyclic compounds | Indoles and derivatives | 379585888 |
| 0.98 | 267.07352 | Inosine | [M-H]- | C10H12N4O5 | Purine nucleosides | C00294 | HMDB0000195 | Nucleosides, nucleotides, and analogues | Purine nucleosides | 319050304 |
| 10.58 | 223.06007 | Isofraxidin | [M+H]+ | C11H10O5 | 7-hydroxycoumarins | C17480 | HMDB0253642 | Phenylpropanoids and polyketides | Coumarins and derivatives | 799164096 |
| 3.47 | 132.10188 | Isoleucine - 50.0 Ev | [M+H]+ | C6H13NO2 | Amino acids and derivatives | C00407 | HMDB0000172 | Organic acids and derivatives | Carboxylic acids and derivatives | 42192809984 |
| 10.08 | 257.08087 | Isoliquiritigenin | [M+H]+ | C15H12O4 | 2-Hydroxychalcones | C08650 | HMDB0037316 | Phenylpropanoids and polyketides | Linear 1,3-diarylpropanoids | 1281866624 |
| 10.34 | 477.10382 | Isorhamnetin-3-Glucoside | [M-H]- | C22H22O12 | Flavonoid O-glycosides | --- | HMDB0302682 | Lipids and lipid-like molecules | Prenol lipids | 258699488 |
| 10.55 | 193.04958 | Isoscopoletin | [M+H]+ | C10H8O4 | Hydroxycoumarins | C18079 | --- | Phenylpropanoids and polyketides | Coumarins and derivatives | 1297500160 |
| 10.03 | 167.03499 | Isovanillic Acid | [M-H]- | C8H8O4 | Benzene and substituted derivatives | --- | HMDB0060003 | Benzenoids | Benzene and substituted derivatives | 1627302016 |
| 11.26 | 285.04041 | Kaempferol | [M-H]- | C15H10O6 | Flavonols | C05903 | HMDB0005801 | Phenylpropanoids and polyketides | Flavonoids | 1055229184 |
| 10.05 | 463.08707 | Kaempferol 3-Glucuronide | [M+H]+ | C21H18O12 | Flavonoid O-glycosides | --- | HMDB0029500 | Phenylpropanoids and polyketides | Flavonoids | 172557680 |
| 10.16 | 449.10788 | Kaempferol 3-O-Glucoside | [M+H]+ | C21H20O11 | Flavonoid O-glycosides | C12249 | HMDB0037429 | Phenylpropanoids and polyketides | Flavonoids | 274686816 |
| 9.99 | 609.14612 | Kaempferol 3-O-Sophoroside | [M-H]- | C27H30O16 | Flavonoid O-glycosides | C12634 | HMDB0037534 | Phenylpropanoids and polyketides | Flavonoids | 66111560 |
| 3.41 | 238.06992 | Kinetin | [M+Na]+ | C10H9N5O | 6-aminopurines | C08272 | HMDB0012245 | Organoheterocyclic compounds | Imidazopyrimidines | 389307232 |
| 4.52 | 143.03387 | Kojic Acid | [M+H]+ | C6H6O4 | Pyranones and derivatives | C14516 | HMDB0032923 | Organoheterocyclic compounds | Pyrans | 3092937984 |
| 0.94 | 132.03021 | L-(+)-Aspartic Acid - 40.0 Ev | [M-H]- | C4H7NO4 | Amino acids and derivatives | C00049 | HMDB0000191 | Organic acids and derivatives | Carboxylic acids and derivatives | 255678400 |
| 9.65 | 377.0856 | Lactose | [M+Cl]- | C12H22O11 | Glycosyl compounds | --- | HMDB0000186 | Organic oxygen compounds | Organooxygen compounds | 141405824 |
| 0.92 | 118.05092 | L-Allo-Threonine | [M-H]- | C4H9NO3 | Amino acids and derivatives | C05519 | HMDB0004041 | Organic acids and derivatives | Carboxylic acids and derivatives | 206161344 |
| 1.41 | 175.11897 | L-Arginine | [M+H]+ | C6H14N4O2 | Amino acids and derivatives | C00062 | HMDB0000517 | Organic acids and derivatives | Carboxylic acids and derivatives | 30467233792 |
| 0.91 | 131.04622 | L-Asparagine | [M-H]- | C4H8N2O3 | Amino acids and derivatives | C00152 | HMDB0000168 | Organic acids and derivatives | Carboxylic acids and derivatives | 1457421568 |
| 1.54 | 162.11247 | L-Carnitine | [M+H]+ | C7H15NO3 | Carnitines | C00318 | HMDB0000062 | Organic nitrogen compounds | Organonitrogen compounds | 291772960 |
| 3.08 | 130.05 | L-Glutamate | [M+H-H2O]+ | C5H9NO4 | Amino acids and derivatives | C00025 | HMDB0000148 | Organic acids and derivatives | Carboxylic acids and derivatives | 21843419136 |
| 1.95 | 177.04042 | L-Gulcono-1,4-Lactone | [M-H]- | C6H10O6 | Gamma butyrolactones | --- | HMDB0243497 | Organoheterocyclic compounds | Lactones | 2330695936 |
| 1.32 | 177.04042 | L-Gulono-1,4-Lactone | [M-H]- | C6H10O6 | Gamma butyrolactones | C01040 | HMDB0003466 | Organoheterocyclic compounds | Lactones | 561736256 |
| 11.15 | 837.39142 | Licoricesaponin G2 | [M-H]- | C42H62O17 | Triterpene glycosides | --- | HMDB0039318 | Lipids and lipid-like molecules | Prenol lipids | 176764064 |
| 11.43 | 255.06631 | Liquiritigenin | [M-H]- | C15H12O4 | Flavanones | C09762 | HMDB0029519 | Phenylpropanoids and polyketides | Flavonoids | 1261522944 |
| 10.33 | 419.13367 | Liquiritin | [M+H]+ | C21H22O9 | Flavonoid O-glycosides | C16989 | HMDB0029520 | Phenylpropanoids and polyketides | Flavonoids | 592527936 |
| 5.29 | 130.08733 | L-Isoleucine | [M-H]- | C6H13NO2 | Amino acids and derivatives | --- | HMDB0033923 | Organic acids and derivatives | Carboxylic acids and derivatives | 179134336 |
| 9.93 | 375.12961 | Loganate | [M-H]- | C16H24O10 | Iridoid O-glycosides | C01512 | HMDB0304409 | Lipids and lipid-like molecules | Prenol lipids | 2008794240 |
| 10.51 | 197.11719 | Loliolide | [M+H]+ | C11H16O3 | Benzofurans | --- | HMDB0302428 | Organoheterocyclic compounds | Benzofurans | 402583104 |
| 10.75 | 197.11719 | Loliolide [Iin-Based | [M+H]+ | C11H16O3 | Benzofurans | --- | HMDB0302428 | Organoheterocyclic compounds | Benzofurans | 788837440 |
| 2.33 | 166.08627 | L-Phenylalanine | [M+H]+ | C9H11NO2 | Amino acids and derivatives | C00079 | HMDB0000159 | Organic acids and derivatives | Carboxylic acids and derivatives | 2255217408 |
| 9.39 | 116.07058 | L-Proline | [M+H]+ | C5H9NO2 | Amino acids and derivatives | C00148 | HMDB0000162 | Organic acids and derivatives | Carboxylic acids and derivatives | 436062336 |
| 9.78 | 205.09718 | L-Tryptophan | [M+H]+ | C11H12N2O2 | Amino acids and derivatives | C00078 | HMDB0000929 | Organoheterocyclic compounds | Indoles and derivatives | 823999680 |
| 3.18 | 182.08118 | L-Tyrosine | [M+H]+ | C9H11NO3 | Amino acids and derivatives | C00082 | HMDB0000158 | Organic acids and derivatives | Carboxylic acids and derivatives | 5733036544 |
| 1.94 | 118.08628 | L-Valine | [M+H]+ | C5H11NO2 | Amino acids and derivatives | C00183 | HMDB0000883 | Organic acids and derivatives | Carboxylic acids and derivatives | 5694036992 |
| 9.84 | 342.17249 | Magnoflorine | [M+H-H2O]+ | C20H24NO4 | Aporphines | C09581 | HMDB0304413 | Alkaloids and derivatives | Aporphines | 64769867776 |
| 12.49 | 265.12341 | Magnolol | [M-H]- | C18H18O2 | Biphenyls and derivatives | C10651 | HMDB0254305 | Benzenoids | Benzene and substituted derivatives | 510278272 |
| 2.04 | 115.00372 | Maleic Acid | [M-H]- | C4H4O4 | Dicarboxylic acids and derivatives | C01384 | HMDB0000176 | Organic acids and derivatives | Carboxylic acids and derivatives | 1889321984 |
| 1.21 | 103.00372 | Malonate | [M-H]- | C3H4O4 | Dicarboxylic acids and derivatives | C00383 | HMDB0000691 | Organic acids and derivatives | Carboxylic acids and derivatives | 2249067520 |
| 14.13 | 377.0856 | Maltose | [M+Cl]- | C12H22O11 | Glycosyl compounds | C00208 | HMDB0000163 | Organic oxygen compounds | Organooxygen compounds | 261721664 |
| 4.61 | 180.10245 | Maltoxazine | [M+CH3OH+H]+ | C10H13NO2 | Pyrrolidines | --- | HMDB0030372 | Organoheterocyclic compounds | Pyrrolidines | 548883200 |
| 1.32 | 227.07719 | Mannitol | [M+FA-H]- | C6H14O6 | Sugar alcohols | C00392 | HMDB0000765 | Organic oxygen compounds | Organooxygen compounds | 486818464 |
| 11.85 | 357.13431 | Matairesinol | [M-H]- | C20H22O6 | Dibenzylbutyrolactone lignans | C10682 | HMDB0035698 | Lignans, neolignans and related compounds | Furanoid lignans | 151035616 |
| 9.95 | 356.1861 | Menisperine | [M+H]+ | C21H26NO4 | Aporphines | --- | --- | Alkaloids and derivatives | Aporphines | 27574499328 |
| 4.81 | 129.01932 | Mesaconate | [M-H]- | C5H6O4 | Branched fatty acids | C01732 | HMDB0000749 | Lipids and lipid-like molecules | Fatty Acyls | 1500241408 |
| 3.90 | 125.02387 | Methyl 2-Furoate | [M-H]- | C6H6O3 | Furans | --- | HMDB0029750 | Organoheterocyclic compounds | Furans | 1945517952 |
| 1.41 | 217.06822 | Methyl Galactoside | [M+Na]+ | C7H14O6 | Glycosyl compounds | --- | HMDB0246173 | Organic oxygen compounds | Organooxygen compounds | 164305888 |
| 9.62 | 348.14172 | Monocrotaline | [M+Na]+ | C16H23NO6 | Pyrrolizines | C10350 | HMDB0034363 | Organoheterocyclic compounds | Pyrrolizines | 1000770816 |
| 1.78 | 89.02387 | Monoethyl Carbonate | [M-H]- | C3H6O3 | Organic carbonic acids and derivatives | --- | HMDB0031232 | Organic acids and derivatives | Organic carbonic acids and derivatives | 11734463488 |
| 0.82 | 259.02188 | Myo-Inositol 1-Phosphate | [M-H]- | C6H13O9P | Organooxygen compounds | C01177 | HMDB0000213 | Organic oxygen compounds | Organooxygen compounds | 33341756 |
| 2.40 | 291.12988 | N-(L-Arginino)Succinate | [M+H]+ | C10H18N4O6 | Amino acids and derivatives | C03406 | HMDB0000052 | Organic acids and derivatives | Carboxylic acids and derivatives | 1304182656 |
| 1.33 | 189.15977 | N,N,N-Trimethyllysine | [M+H]+ | C9H20N2O2 | --- | C03793 | HMDB0001325 | Organic acids and derivatives | Carboxylic acids and derivatives | 1531200000 |
| 1.61 | 175.10768 | N5-Ethyl-L-Glutamine | [M+H]+ | C7H14N2O3 | Amino acids and derivatives | C01047 | HMDB0034365 | Organic acids and derivatives | Carboxylic acids and derivatives | 380122720 |
| 4.11 | 259.129 | N6-(L-1,3-Dicarboxypropyl)-L-Lysine | [M+H-H2O]+ | C11H20N2O6 | Amino acids and derivatives | C00449 | HMDB0000279 | Organic acids and derivatives | Carboxylic acids and derivatives | 352934336 |
| 3.15 | 188.05643 | N-Acetyl-Dl-Glutamic Acid | [M-H]- | C7H11NO5 | Amino acids and derivatives | C00624 | HMDB0001138 | Organic acids and derivatives | Carboxylic acids and derivatives | 810632128 |
| 9.81 | 194.08118 | N-Benzoyl-Dl-Alanine | [M+H]+ | C10H11NO3 | Amino acids and derivatives | --- | HMDB0255085 | Organic acids and derivatives | Carboxylic acids and derivatives | 1052123328 |
| 10.69 | 314.13867 | N-Feruloyltyramine | [M+H]+ | C18H19NO4 | Methoxyphenols | C02717 | HMDB0029365 | Benzenoids | Phenols | 13795220480 |
| 10.12 | 593.15125 | Nicotiflorin | [M-H]- | C27H30O15 | Flavonoid O-glycosides | C21833 | HMDB0302426 | Phenylpropanoids and polyketides | Flavonoids | 77541616 |
| 2.73 | 123.05528 | Nicotinamide | [M+H]+ | C6H6N2O | Pyridinecarboxamides | C00153 | HMDB0001406 | Organoheterocyclic compounds | Pyridines and derivatives | 7858011648 |
| 2.00 | 122.02472 | Nicotinate | [M-H]- | C6H5NO2 | Pyridinecarboxylic acids | C00253 | HMDB0001488 | Organoheterocyclic compounds | Pyridines and derivatives | 188914352 |
| 2.46 | 124.03928 | Nicotinate - 60.0 Ev | [M+H]+ | C6H5NO2 | Pyridinecarboxylic acids | C00253 | HMDB0001488 | Organoheterocyclic compounds | Pyridines and derivatives | 8535424512 |
| 9.97 | 324.1236 | N-Methoxycarbonylanonaine | [M+Na]+ | C19H17NO4 | Aporphines | --- | HMDB0041538 | Alkaloids and derivatives | Aporphines | 2608683008 |
| 9.78 | 180.13828 | N-Methylephedrine | [M+H]+ | C11H17NO | Phenylpropanes | C13639 | HMDB0041932 | Benzenoids | Benzene and substituted derivatives | 545881536 |
| 4.63 | 242.11758 | N-Methylflindersine | [M+H]+ | C15H15NO2 | Pyranoquinolines | C10731 | --- | Organoheterocyclic compounds | Quinolines and derivatives | 483747104 |
| 1.57 | 138.05498 | N-Methylnicotinate | [M+H]+ | C7H7NO2 | Alkaloids and derivatives | C01004 | HMDB0000875 | Alkaloids and derivatives | --- | 2336080384 |
| 5.69 | 152.10698 | N-Methyltyramine | [M+H]+ | C9H13NO | Phenethylamines | C02442 | HMDB0003633 | Benzenoids | Benzene and substituted derivatives | 463850496 |
| 1.36 | 213.07578 | N-Propyl Gallate | [M+H]+ | C10H12O5 | Hydroxybenzoic acid derivatives | C11155 | HMDB0033835 | Benzenoids | Benzene and substituted derivatives | 1683925632 |
| 3.88 | 136.075 | Octopamine | [M+H-H2O]+ | C8H11NO2 | 1-hydroxy-2-unsubstituted benzenoids | C04227 | HMDB0004825 | Benzenoids | Phenols | 1919442688 |
| 10.43 | 431.13367 | Ononin | [M+H]+ | C22H22O9 | Isoflavonoid O-glycosides | C10509 | HMDB0033987 | Phenylpropanoids and polyketides | Isoflavonoids | 2244430080 |
| 10.85 | 459.09332 | Oroxindin | [M-H]- | C22H20O11 | Flavonoid O-glycosides | --- | --- | Phenylpropanoids and polyketides | Flavonoids | 2561083648 |
| 10.23 | 525.16138 | Paeoniflorin | [M+HCOO]- | C23H28O11 | Terpene glycosides | C09959 | HMDB0256075 | Lipids and lipid-like molecules | Prenol lipids | 1615212032 |
| 10.74 | 167.07028 | Paeonol | [M+H]+ | C9H10O3 | Ketones | C10712 | HMDB0256081 | Organic oxygen compounds | Organooxygen compounds | 1183988608 |
| 10.23 | 352.15399 | Palmatine | [M]+ | C21H22NO4+ | Protoberberine alkaloids and derivatives | C05315 | --- | Alkaloids and derivatives | Protoberberine alkaloids and derivatives | 13570614272 |
| 9.98 | 432.34717 | Peimine | [M+H]+ | C27H45NO3 | Cerveratrum-type alkaloids | C10830 | HMDB0256205 | Lipids and lipid-like molecules | Steroids and steroid derivatives | 494071296 |
| 13.57 | 75.00822 | Peracetic Acid | [M-H]- | C2H4O3 | Carboxylic acids and derivatives | --- | HMDB0031608 | Organic acids and derivatives | Carboxylic acids and derivatives | 206075088 |
| 9.74 | 314.13867 | Perfamine | [M+H]+ | C18H19NO4 | Furopyridines | --- | --- | --- | --- | 3586692608 |
| 10.01 | 265.09772 | Perlolyrine | [M+H]+ | C16H12N2O2 | Harmala alkaloids | C09231 | HMDB0030327 | Alkaloids and derivatives | Harmala alkaloids | 377564256 |
| 3.89 | 95.04918 | Phenol | [M+H]+ | C6H6O | 1-hydroxy-4-unsubstituted benzenoids | C00146 | HMDB0000228 | Benzenoids | Phenols | 518028928 |
| 9.64 | 166.08627 | Phenylalanine - 50.00 Ev | [M+H]+ | C9H11NO2 | Amino acids and derivatives | C00079 | HMDB0000159 | Organic acids and derivatives | Carboxylic acids and derivatives | 5455490560 |
| 9.31 | 168.10188 | Phenylephrine | [M+H]+ | C9H13NO2 | 1-hydroxy-4-unsubstituted benzenoids | C07441 | HMDB0002182 | Benzenoids | Phenols | 389663456 |
| 9.66 | 120.081 | Phenylethanolamine | [M+H-H2O]+ | C8H11NO | Aralkylamines | C02735 | HMDB0001065 | Organic nitrogen compounds | Organonitrogen compounds | 4523883520 |
| 10.08 | 391.13879 | Piceid | [M+H]+ | C20H22O8 | Stilbene glycosides | C10275 | HMDB0030564 | Phenylpropanoids and polyketides | Stilbenes | 174389600 |
| 10.68 | 515.15234 | Picroside I | [M+Na]+ | C24H28O11 | O-glycosyl compounds | --- | HMDB0250017 | Phenylpropanoids and polyketides | Cinnamic acids and derivatives | 117982736 |
| 11.33 | 291.08743 | Picrotoxinin | [M-H]- | C15H16O6 | Furopyrans | C09529 | HMDB0240274 | Organoheterocyclic compounds | Furopyrans | 578575744 |
| 3.44 | 86.09638 | Piperidine | [M+H]+ | C5H11N | Piperidines | C01746 | HMDB0034301 | Organoheterocyclic compounds | Piperidines | 7626076160 |
| 10.75 | 207.10158 | P-Methoxycinnamic Acid Ethyl Ester | [M+H]+ | C12H14O3 | Cinnamic acid esters | C10476 | HMDB0030762 | Phenylpropanoids and polyketides | Cinnamic acids and derivatives | 1582915712 |
| 11.08 | 198.98788 | Poppy Acid | [M-H]- | C7H4O7 | Pyrans | C20209 | HMDB0033695 | Organoheterocyclic compounds | Pyrans | 928903232 |
| 1.60 | 116.07058 | Proline | [M+H]+ | C5H9NO2 | Amino acids and derivatives | --- | HMDB0251528 | Organic acids and derivatives | Carboxylic acids and derivatives | 26713673728 |
| 3.54 | 210.11247 | Propoxur | [M+H]+ | C11H15NO3 | Phenol ethers | C14334 | HMDB0256832 | Benzenoids | Phenol ethers | 1126292352 |
| 4.43 | 260.16449 | Propranolol | [M+H]+ | C16H21NO2 | Naphthalenes | C07407 | HMDB0001849 | Benzenoids | Naphthalenes | 146121552 |
| 6.12 | 97.0284 | Protoanemonin | [M+H]+ | C5H4O2 | Dihydrofurans | C07090 | HMDB0060503 | Organoheterocyclic compounds | Dihydrofurans | 1102074496 |
| 1.37 | 203.05263 | Psicose | [M+Na]+ | C6H12O6 | Monosaccharides | --- | --- | --- | --- | 5731016192 |
| 9.85 | 417.11798 | Puerarin | [M+H]+ | C21H20O9 | Isoflavonoid C-glycosides | C10524 | HMDB0240265 | Phenylpropanoids and polyketides | Isoflavonoids | 613801024 |
| 9.99 | 549.16028 | Puerarin Xyloside II | [M+H]+ | C26H28O13 | Isoflavonoid C-glycosides | --- | --- | --- | --- | 788122816 |
| 4.47 | 168.06548 | Pyridoxal | [M+H]+ | C8H9NO3 | Pyridoxals and derivatives | C00250 | HMDB0001545 | Organoheterocyclic compounds | Pyridines and derivatives | 258287872 |
| 3.22 | 170.08118 | Pyridoxine | [M+H]+ | C8H11NO3 | Pyridoxines | C00314 | HMDB0000239 | Organoheterocyclic compounds | Pyridines and derivatives | 792217856 |
| 10.96 | 301.03531 | Quercetin | [M-H]- | C15H10O7 | Flavonols | C00389 | HMDB0005794 | Phenylpropanoids and polyketides | Flavonoids | 4272135168 |
| 10.05 | 465.10278 | Quercetin 3-O-Glucoside | [M+H]+ | C21H20O12 | Flavonoid O-glycosides | C05623 | HMDB0037362 | Phenylpropanoids and polyketides | Flavonoids | 206429392 |
| 10.36 | 447.09332 | Quercetin-7-O-Rhamnoside | [M-H]- | C21H20O11 | Flavonoid O-glycosides | --- | HMDB0257019 | Phenylpropanoids and polyketides | Flavonoids | 198216256 |
| 10.08 | 191.05612 | Quinate | [M-H]- | C7H12O6 | Cyclic alcohols and derivatives | C00296 | HMDB0003072 | Organic oxygen compounds | Organooxygen compounds | 2050499968 |
| 13.52 | 503.16171 | Raffinose | [M-H]- | C18H32O16 | Oligosaccharides | C00492 | HMDB0003213 | Organic oxygen compounds | Organooxygen compounds | 91637944 |
| 10.08 | 229.08588 | Resveratrol | [M+H]+ | C14H12O3 | Stilbenes | C03582 | HMDB0003747 | Phenylpropanoids and polyketides | Stilbenes | 879025216 |
| 10.54 | 359.07721 | Rosmarinic Acid | [M-H]- | C18H16O8 | Coumaric acids and derivatives | C01850 | HMDB0257311 | Phenylpropanoids and polyketides | Cinnamic acids and derivatives | 455561344 |
| 10.89 | 253.05061 | Rubiadin | [M-H]- | C15H10O4 | Hydroxyanthraquinones | C10402 | HMDB0257354 | Benzenoids | Anthracenes | 395870144 |
| 10.58 | 447.12613 | Rutarin | [M+Na]+ | C20H24O10 | Coumarin glycosides | C09309 | HMDB0030884 | Phenylpropanoids and polyketides | Coumarins and derivatives | 129219240 |
| 6.66 | 123.04408 | Salicylaldehyde | [M+H]+ | C7H6O2 | Aldehydes | C06202 | HMDB0034170 | Organic oxygen compounds | Organooxygen compounds | 731394560 |
| 10.12 | 139.03899 | Salicylate | [M+H]+ | C7H6O3 | Hydroxybenzoic acid derivatives | C00805 | HMDB0001895 | Benzenoids | Benzene and substituted derivatives | 649165568 |
| 9.71 | 208.13318 | Salsolidine | [M+H]+ | C12H17NO2 | Tetrahydroisoquinolines | --- | --- | Organoheterocyclic compounds | Tetrahydroisoquinolines | 625702208 |
| 9.63 | 194.11758 | Salsoline | [M+H]+ | C11H15NO2 | Tetrahydroisoquinolines | --- | HMDB0003626 | Organoheterocyclic compounds | Tetrahydroisoquinolines | 1185094784 |
| 3.83 | 180.10188 | Salsolinol | [M+H]+ | C10H13NO2 | Tetrahydroisoquinolines | C09642 | HMDB0042012 | Organoheterocyclic compounds | Tetrahydroisoquinolines | 5965832192 |
| 10.54 | 717.14612 | Salvianolic Acid B | [M-H]- | C36H30O16 | 2-arylbenzofuran flavonoids | --- | HMDB0242648 | Phenylpropanoids and polyketides | 2-arylbenzofuran flavonoids | 514647264 |
| 1.33 | 90.05498 | Sarcosine | [M+H]+ | C3H7NO2 | Amino acids and derivatives | C00213 | HMDB0000271 | Organic acids and derivatives | Carboxylic acids and derivatives | 101509488 |
| 10.33 | 207.06519 | Scoparone | [M+H]+ | C11H10O4 | Coumarins and derivatives | C09311 | HMDB0030818 | Phenylpropanoids and polyketides | Coumarins and derivatives | 729287808 |
| 10.72 | 191.03502 | Scopoletin | [M-H]- | C10H8O4 | 7-hydroxycoumarins | C01752 | HMDB0034344 | Phenylpropanoids and polyketides | Coumarins and derivatives | 898643712 |
| 11.99 | 373.09293 | Scullcapflavone Ii | [M-H]- | C19H18O8 | 8-O-methylated flavonoids | C10183 | HMDB0258335 | Phenylpropanoids and polyketides | Flavonoids | 694371520 |
| 0.95 | 179.05556 | Scyllo-Inositol | [2M-H]- | C6H12O6 | Organooxygen compounds | C06153 | HMDB0006088 | Organic oxygen compounds | Organooxygen compounds | 11540774912 |
| 10.93 | 201.11322 | Sebacic Acid - 40.0 Ev | [M-H]- | C10H18O4 | Medium-chain fatty acids | C08277 | HMDB0000792 | Lipids and lipid-like molecules | Fatty Acyls | 360543200 |
| 10.01 | 389.14417 | Secologanin | [M+H]+ | C17H24O10 | Terpene glycosides | C01852 | HMDB0304482 | Lipids and lipid-like molecules | Prenol lipids | 411218304 |
| 1.01 | 209.06613 | Sedoheptulose | [M-H]- | C7H14O7 | Organooxygen compounds | C02076 | HMDB0003219 | Organic oxygen compounds | Organooxygen compounds | 778680768 |
| 9.69 | 334.16489 | Seneciphylline | [M+H]+ | C18H23NO5 | Alkaloids and derivatives | C10391 | HMDB0258231 | Alkaloids and derivatives | --- | 240204704 |
| 10.29 | 137.02386 | Sesamol | [M-H]- | C7H6O3 | Benzodioxoles | C10832 | HMDB0033812 | Organoheterocyclic compounds | Benzodioxoles | 2555408896 |
| 9.85 | 405.14023 | Shanzhiside Methyl Ester | [M-H]- | C17H26O11 | Iridoid O-glycosides | --- | HMDB0258271 | Lipids and lipid-like molecules | Prenol lipids | 151761648 |
| 1.54 | 173.04552 | Shikimate | [M-H]- | C7H10O5 | Cyclic alcohols and derivatives | C00493 | HMDB0003070 | Organic oxygen compounds | Organooxygen compounds | 127769520 |
| 10.59 | 223.06122 | Sinapate | [M-H]- | C11H12O5 | Hydroxycinnamic acids | C00482 | HMDB0032616 | Phenylpropanoids and polyketides | Cinnamic acids and derivatives | 757789248 |
| 9.81 | 310.16434 | Sinapine | [M]+ | C16H24NO5 | Coumaric acids and derivatives | C00933 | HMDB0029379 | Phenylpropanoids and polyketides | Cinnamic acids and derivatives | 425213440 |
| 10.66 | 207.06631 | Sinapoyl Aldehyde | [M-H]- | C11H12O4 | Methoxyphenols | C05610 | HMDB0258301 | Benzenoids | Phenols | 1510255872 |
| 10.33 | 193.086 | Sinapyl Alcohol | [M+H-H2O]+ | C11H14O4 | Methoxyphenols | C02325 | HMDB0013070 | Benzenoids | Phenols | 992146944 |
| 10.23 | 414.33667 | Solasodine | [M+H]+ | C27H43NO2 | Spirosolanes and derivatives | C10822 | HMDB0035282 | Lipids and lipid-like molecules | Steroids and steroid derivatives | 150400736 |
| 1.47 | 247.18048 | Sophocarpine | [M+H]+ | C15H22N2O | Matrine alkaloids | --- | HMDB0258379 | Alkaloids and derivatives | Lupin alkaloids | 276837120 |
| 1.18 | 146.16518 | Spermidine | [M+H]+ | C7H19N3 | Secondary amines | C00315 | HMDB0001257 | Organic nitrogen compounds | Organonitrogen compounds | 82751784 |
| 1.58 | 144.10188 | Stachydrine | [M+H]+ | C7H13NO2 | Amino acids and derivatives | C10172 | HMDB0004827 | Organic acids and derivatives | Carboxylic acids and derivatives | 3018460672 |
| 1.50 | 689.211 | Stachyose | [M+Na]+ | C24H42O21 | Oligosaccharides | C01613 | HMDB0003553 | Organic oxygen compounds | Organooxygen compounds | 77572144 |
| 9.81 | 298.14377 | Stepharine | [M+H]+ | C18H19NO3 | Proaporphines | --- | --- | Alkaloids and derivatives | Proaporphines | 4717699072 |
| 10.05 | 105.06988 | Styrene | [M+H]+ | C8H8 | Styrenes | C07083 | HMDB0034240 | Benzenoids | Benzene and substituted derivatives | 159634272 |
| 3.09 | 117.01932 | Succinate | [M-H]- | C4H6O4 | Dicarboxylic acids and derivatives | C00042 | HMDB0000254 | Organic acids and derivatives | Carboxylic acids and derivatives | 11704629248 |
| 1.75 | 365.10541 | Sucrose | [M+Na]+ | C12H22O11 | Glycosyl compounds | C00089 | HMDB0000258 | Organic oxygen compounds | Organooxygen compounds | 930116288 |
| 9.62 | 341.10892 | Sucrose - 40.0 Ev | [M-H]- | C12H22O11 | Glycosyl compounds | C00089 | HMDB0000258 | Organic oxygen compounds | Organooxygen compounds | 423487392 |
| 10.32 | 455.35001 | Sumaresinol | [M+H-H2O]+ | C30H48O4 | Triterpenoids | C17070 | --- | Lipids and lipid-like molecules | Prenol lipids | 151117712 |
| 9.95 | 359.13367 | Sweroside | [M+H]+ | C16H22O9 | Glycosyl compounds | C17071 | HMDB0258643 | Organic oxygen compounds | Organooxygen compounds | 944979328 |
| 10.06 | 419.11951 | Swertiamarin | [M+FA-H]- | C16H22O10 | Glycosyl compounds | C09800 | HMDB0258644 | Organic oxygen compounds | Organooxygen compounds | 178171120 |
| 10.65 | 197.04552 | Syringic Acid | [M-H]- | C9H10O5 | Hydroxybenzoic acid derivatives | C10833 | HMDB0002085 | Benzenoids | Benzene and substituted derivatives | 1225005056 |
| 9.59 | 390.17581 | Syringin | [M+NH4]+ | C17H24O9 | Glycosyl compounds | C01533 | --- | Organic oxygen compounds | Organooxygen compounds | 123439160 |
| 10.18 | 305.06558 | Taxifolin | [M+H]+ | C15H12O7 | Flavanones | C01617 | HMDB0303943 | Phenylpropanoids and polyketides | Flavonoids | 1551493248 |
| 3.93 | 230.11668 | Terbuthylazine | [M+H]+ | C9H16ClN5 | Aminotriazines | C18810 | HMDB0258829 | Organoheterocyclic compounds | Triazines | 335715808 |
| 10.64 | 409.14929 | Tinnevellin Glucoside | [M+H]+ | C20H24O9 | Phenolic glycosides | --- | --- | --- | --- | 166438544 |
| 1.18 | 173.00912 | Trans-Aconitic Acid | [M-H]- | C6H6O6 | Tricarboxylic acids and derivatives | C02341 | HMDB0000958 | Organic acids and derivatives | Carboxylic acids and derivatives | 2298301952 |
| 10.16 | 371.09839 | Trans-Beta-D-Glucosyl-2-Hydroxycinnamate | [M+FA-H]- | C15H18O8 | Glycosyl compounds | C05158 | HMDB0033581 | Organic oxygen compounds | Organooxygen compounds | 244293632 |
| 9.67 | 328.13901 | Trans-Cinnamoyl Beta-D-Glucoside | [M+NH4]+ | C15H18O7 | O-cinnamoyl glycosides | C04164 | HMDB0304505 | Phenylpropanoids and polyketides | Cinnamic acids and derivatives | 975431488 |
| 10.26 | 435.1297 | Trans-Piceid | [M+FA-H]- | C20H22O8 | Stilbene glycosides | --- | HMDB0030564 | Phenylpropanoids and polyketides | Stilbenes | 463436864 |
| 11.45 | 329.06662 | Tricin | [M-H]- | C17H14O7 | 3-O-methylated flavonoids | C10193 | --- | Phenylpropanoids and polyketides | Flavonoids | 262134016 |
| 10.65 | 165.05573 | Tropate | [M-H]- | C9H10O3 | Beta hydroxy acids and derivatives | C01456 | HMDB0062590 | Organic acids and derivatives | Hydroxy acids and derivatives | 547257216 |
| 3.95 | 138.09138 | Tyramine | [M+H]+ | C8H11NO | Phenethylamines | C00483 | HMDB0000306 | Benzenoids | Benzene and substituted derivatives | 1643506688 |
| 3.89 | 182.08118 | Tyrosine | [M+H]+ | C9H11NO3 | Amino acids and derivatives | C00082 | HMDB0000158 | Organic acids and derivatives | Carboxylic acids and derivatives | 8814121984 |
| 10.54 | 182.08118 | Tyrosine|2-Amino-3-(4-Hydroxyphenyl)Propanoic Acid | [M+H]+ | C9H11NO3 | Amino acids and derivatives | C00082 | HMDB0250803 | Organic acids and derivatives | Carboxylic acids and derivatives | 360326432 |
| 3.32 | 323.02863 | UMP | [M-H]- | C9H13N2O9P | Pyrimidine ribonucleoside monophosphates | C00105 | HMDB0000288 | Nucleosides, nucleotides, and analogues | Pyrimidine nucleotides | 226856736 |
| 4.45 | 113.03458 | Uracil | [M+H]+ | C4H4N2O2 | Pyrimidones | C00106 | HMDB0000300 | Organoheterocyclic compounds | Diazines | 3219103744 |
| 3.88 | 243.06223 | Uridine | [M-H]- | C9H12N2O6 | Pyrimidine nucleosides | C00299 | HMDB0000296 | Nucleosides, nucleotides, and analogues | Pyrimidine nucleosides | 2871290112 |
| 4.11 | 245.07678 | Uridine - 30.0 Ev | [M+H]+ | C9H12N2O6 | Pyrimidine nucleosides | C00299 | HMDB0000296 | Nucleosides, nucleotides, and analogues | Pyrimidine nucleosides | 171849712 |
| 10.40 | 167.03502 | Vanillate | [M-H]- | C8H8O4 | Methoxybenzoic acids and derivatives | C06672 | HMDB0000484 | Benzenoids | Benzene and substituted derivatives | 1283239936 |
| 6.05 | 827.2674 | Verbascose | [M-H]- | C30H52O26 | Oligosaccharides | C08252 | HMDB0259784 | Organic oxygen compounds | Organooxygen compounds | 72327240 |
| 10.16 | 623.19812 | Verbascoside | [M-H]- | C29H36O15 | Coumaric acids and derivatives | C10501 | HMDB0259785 | Phenylpropanoids and polyketides | Cinnamic acids and derivatives | 252704400 |
| 10.72 | 461.10788 | Wogonoside | [M+H]+ | C22H20O11 | Flavonoid O-glycosides | --- | HMDB0259901 | Phenylpropanoids and polyketides | Flavonoids | 10649183232 |
| 10.29 | 197.08089 | Xanthoxylin | [M+H]+ | C10H12O4 | Ketones | C10726 | HMDB0029645 | Organic oxygen compounds | Organooxygen compounds | 1834384640 |
| 0.94 | 151.06122 | Xylitol | [M-H]- | C5H12O5 | Sugar alcohols | C00379 | HMDB0242149 | Organic oxygen compounds | Organooxygen compounds | 380304960 |
| 9.84 | 151.039 |  |  |  |  |  |  |  |  | 548250432 |
| 2.05 | 130.04988 |  |  |  |  |  |  |  |  | 8536912384 |
| 10.41 | 345.10971 |  |  |  |  |  |  |  |  | 497031744 |
| 1.77 | 134.04723 |  |  |  |  |  |  |  |  | 1845317888 |
| 1.72 | 360.15002 |  |  |  |  |  |  |  |  | 105923368 |
| 3.98 | 346.05582 |  |  |  |  |  |  |  |  | 51359392 |
| 6.66 | 109.06534 |  |  |  |  |  |  |  |  | 87170248 |
| 10.18 | 451.12347 |  |  |  |  |  |  |  |  | 1074396672 |
| 10.05 | 171.101 |  |  |  |  |  |  |  |  | 242430576 |
| 10.54 | 445.07761 |  |  |  |  |  |  |  |  | 1927976704 |
| 10.64 | 301.07068 |  |  |  |  |  |  |  |  | 217241104 |
| 1.54 | 363.06863 |  |  |  |  |  |  |  |  | 95489784 |
| 10.61 | 193.05061 |  |  |  |  |  |  |  |  | 556171904 |
| 10.43 | 269.08087 |  |  |  |  |  |  |  |  | 368284800 |
| 6.26 | 171.02878 |  |  |  |  |  |  |  |  | 274639488 |
| 10.44 | 431.09833 |  |  |  |  |  |  |  |  | 243153008 |
| 10.73 | 221.04552 |  |  |  |  |  |  |  |  | 645750400 |
| 12.02 | 255.06631 |  |  |  |  |  |  |  |  | 143645680 |
| 10.61 | 287.05499 |  |  |  |  |  |  |  |  | 560772864 |
| 13.59 | 141.01932 |  |  |  |  |  |  |  |  | 181768544 |
| 0.91 | 173.10442 |  |  |  |  |  |  |  |  | 520593920 |
| 0.94 | 146.04591 |  |  |  |  |  |  |  |  | 274474080 |
| 10.83 | 312.12411 |  |  |  |  |  |  |  |  | 390851360 |
| 9.39 | 124.03928 |  |  |  |  |  |  |  |  | 115204632 |
| 10.18 | 303.04987 |  |  |  |  |  |  |  |  | 169032384 |
| 9.95 | 225.07578 |  |  |  |  |  |  |  |  | 229895472 |
| 1.57 | 665.21454 |  |  |  |  |  |  |  |  | 51458396 |
| 1.32 | 341.10892 |  |  |  |  |  |  |  |  | 707397184 |
| 10.50 | 199.06007 |  |  |  |  |  |  |  |  | 302323520 |
| 10.55 | 303.05103 |  |  |  |  |  |  |  |  | 299988288 |
| 3.41 | 344.13403 |  |  |  |  |  |  |  |  | 154635568 |
| 4.45 | 245.07678 |  |  |  |  |  |  |  |  | 929943936 |
| 10.20 | 169.04958 |  |  |  |  |  |  |  |  | 244143952 |
| 6.69 | 145.04958 |  |  |  |  |  |  |  |  | 11641056256 |
| 6.21 | 180.13828 |  |  |  |  |  |  |  |  | 492037280 |
| 10.57 | 439.15741 |  |  |  |  |  |  |  |  | 10727334912 |
| 10.46 | 330.13358 |  |  |  |  |  |  |  |  | 459838080 |
| 9.76 | 330.16998 |  |  |  |  |  |  |  |  | 1.07364E+11 |
| 10.19 | 551.1759 |  |  |  |  |  |  |  |  | 51199192 |
| 2.62 | 298.11459 |  |  |  |  |  |  |  |  | 280932928 |
| 10.67 | 477.10278 |  |  |  |  |  |  |  |  | 3150386688 |
| 10.61 | 461.10788 |  |  |  |  |  |  |  |  | 6625210880 |
| 10.23 | 499.12299 |  |  |  |  |  |  |  |  | 391895168 |
| 1.65 | 198.09721 |  |  |  |  |  |  |  |  | 636735616 |
| 9.55 | 325.11301 |  |  |  |  |  |  |  |  | 182970432 |
| 2.03 | 163.06 |  |  |  |  |  |  |  |  | 1639479168 |
| 9.78 | 188.07001 |  |  |  |  |  |  |  |  | 983078784 |
| 10.16 | 479.11838 |  |  |  |  |  |  |  |  | 99687872 |
| 3.89 | 165.05499 |  |  |  |  |  |  |  |  | 1825171072 |
| 9.39 | 113.05968 |  |  |  |  |  |  |  |  | 120631264 |
| 4.66 | 272.12808 |  |  |  |  |  |  |  |  | 195519632 |
| 1.48 | 527.1582 |  |  |  |  |  |  |  |  | 451283168 |
| 1.66 | 96.04494 |  |  |  |  |  |  |  |  | 517232768 |
| 9.97 | 121.06534 |  |  |  |  |  |  |  |  | 1728481792 |
| 5.72 | 121.06534 |  |  |  |  |  |  |  |  | 240666512 |
| 2.85 | 298.11459 |  |  |  |  |  |  |  |  | 247368496 |
| 4.08 | 110.06008 |  |  |  |  |  |  |  |  | 828376960 |
| 10.51 | 110.06008 |  |  |  |  |  |  |  |  | 375766080 |
| 6.67 | 137.06026 |  |  |  |  |  |  |  |  | 877664576 |
| 10.27 | 477.10278 |  |  |  |  |  |  |  |  | 257789248 |
| 10.05 | 107.049 |  |  |  |  |  |  |  |  | 356662688 |
| 10.62 | 285.07578 |  |  |  |  |  |  |  |  | 451313248 |
| 1.55 | 104.07058 |  |  |  |  |  |  |  |  | 728596096 |
| 1.44 | 104.07058 |  |  |  |  |  |  |  |  | 738507840 |
| 4.63 | 150.09138 |  |  |  |  |  |  |  |  | 146196624 |
| 3.19 | 150.09138 |  |  |  |  |  |  |  |  | 1010038784 |
| 3.60 | 150.09138 |  |  |  |  |  |  |  |  | 353711488 |
| 2.33 | 150.09138 |  |  |  |  |  |  |  |  | 2702952704 |
| 1.62 | 146.09238 |  |  |  |  |  |  |  |  | 1165185536 |
| 10.13 | 149.05968 |  |  |  |  |  |  |  |  | 636439744 |
| 1.93 | 148.11263 |  |  |  |  |  |  |  |  | 1690682624 |
| 9.39 | 136.06178 |  |  |  |  |  |  |  |  | 978421312 |
| 8.76 | 136.06178 |  |  |  |  |  |  |  |  | 798479104 |
| 10.27 | 481.17038 |  |  |  |  |  |  |  |  | 3074912256 |
| 2.85 | 348.07037 |  |  |  |  |  |  |  |  | 235581648 |
| 3.07 | 158.09402 |  |  |  |  |  |  |  |  | 2714760192 |
| 2.44 | 158.09402 |  |  |  |  |  |  |  |  | 2032343296 |
| 1.41 | 158.09402 |  |  |  |  |  |  |  |  | 311049536 |
| 1.64 | 158.09402 |  |  |  |  |  |  |  |  | 384946368 |
| 4.66 | 163.12299 |  |  |  |  |  |  |  |  | 182186304 |
| 10.20 | 171.101 |  |  |  |  |  |  |  |  | 540394240 |
| 3.89 | 119.04969 |  |  |  |  |  |  |  |  | 501218176 |
| 10.11 | 336.12357 |  |  |  |  |  |  |  |  | 3700690688 |
| 1.40 | 140.06822 |  |  |  |  |  |  |  |  | 245797392 |
| 9.73 | 316.15427 |  |  |  |  |  |  |  |  | 3828136960 |
| 8.92 | 104.10751 |  |  |  |  |  |  |  |  | 1059918464 |
| 9.46 | 104.10751 |  |  |  |  |  |  |  |  | 256695376 |
| 10.15 | 469.17038 |  |  |  |  |  |  |  |  | 561360768 |
| 10.43 | 469.17038 |  |  |  |  |  |  |  |  | 839098304 |
| 10.61 | 469.17038 |  |  |  |  |  |  |  |  | 711774592 |
| 6.64 | 165.05518 |  |  |  |  |  |  |  |  | 4041713920 |
| 4.72 | 165.05518 |  |  |  |  |  |  |  |  | 401594016 |
| 5.97 | 165.05518 |  |  |  |  |  |  |  |  | 1780769280 |
| 4.35 | 179.07028 |  |  |  |  |  |  |  |  | 640353024 |
| 2.01 | 274.09103 |  |  |  |  |  |  |  |  | 4810666496 |
| 2.36 | 274.09103 |  |  |  |  |  |  |  |  | 4095582720 |
| 10.33 | 235.16928 |  |  |  |  |  |  |  |  | 481983424 |
| 1.65 | 112.05058 |  |  |  |  |  |  |  |  | 536291264 |
| 1.65 | 180.08669 |  |  |  |  |  |  |  |  | 1176008832 |
| 3.89 | 87.04408 |  |  |  |  |  |  |  |  | 312301152 |
| 10.41 | 301.07068 |  |  |  |  |  |  |  |  | 484641792 |
| 1.33 | 202.06862 |  |  |  |  |  |  |  |  | 80426064 |
| 9.83 | 195.06519 |  |  |  |  |  |  |  |  | 807291520 |
| 10.72 | 625.25439 |  |  |  |  |  |  |  |  | 133510520 |
| 2.29 | 152.05669 |  |  |  |  |  |  |  |  | 1597217664 |
| 2.10 | 112.08688 |  |  |  |  |  |  |  |  | 1718622976 |
| 9.97 | 165.05499 |  |  |  |  |  |  |  |  | 421857344 |
| 2.03 | 111.04408 |  |  |  |  |  |  |  |  | 837459136 |
| 10.19 | 430.33157 |  |  |  |  |  |  |  |  | 204971520 |
| 3.71 | 132.10188 |  |  |  |  |  |  |  |  | 20410112000 |
| 3.51 | 238.06992 |  |  |  |  |  |  |  |  | 297403680 |
| 2.39 | 238.06992 |  |  |  |  |  |  |  |  | 397242304 |
| 2.03 | 238.06992 |  |  |  |  |  |  |  |  | 584237568 |
| 9.95 | 143.03387 |  |  |  |  |  |  |  |  | 981115648 |
| 1.73 | 175.11897 |  |  |  |  |  |  |  |  | 10714995712 |
| 8.95 | 175.11897 |  |  |  |  |  |  |  |  | 199107424 |
| 1.36 | 197.10092 |  |  |  |  |  |  |  |  | 305603808 |
| 1.44 | 162.11247 |  |  |  |  |  |  |  |  | 185578720 |
| 2.35 | 130.05 |  |  |  |  |  |  |  |  | 22307844096 |
| 3.36 | 166.08627 |  |  |  |  |  |  |  |  | 1242029184 |
| 10.13 | 166.08627 |  |  |  |  |  |  |  |  | 482757504 |
| 6.69 | 116.07058 |  |  |  |  |  |  |  |  | 835099136 |
| 10.51 | 116.07058 |  |  |  |  |  |  |  |  | 549141632 |
| 10.64 | 342.17249 |  |  |  |  |  |  |  |  | 1478188544 |
| 9.59 | 180.10245 |  |  |  |  |  |  |  |  | 676135552 |
| 10.72 | 180.10245 |  |  |  |  |  |  |  |  | 1103432576 |
| 1.62 | 291.12988 |  |  |  |  |  |  |  |  | 621362432 |
| 9.70 | 259.129 |  |  |  |  |  |  |  |  | 385583136 |
| 4.64 | 194.08118 |  |  |  |  |  |  |  |  | 307729344 |
| 10.12 | 432.34717 |  |  |  |  |  |  |  |  | 259569984 |
| 1.73 | 203.05263 |  |  |  |  |  |  |  |  | 1678134656 |
| 9.95 | 417.11798 |  |  |  |  |  |  |  |  | 639305088 |
| 2.79 | 168.06548 |  |  |  |  |  |  |  |  | 477624640 |
| 10.69 | 229.08588 |  |  |  |  |  |  |  |  | 700496320 |
| 9.71 | 208.13318 |  |  |  |  |  |  |  |  | 652254208 |
| 2.53 | 194.11758 |  |  |  |  |  |  |  |  | 378091232 |
| 1.65 | 163.06 |  |  |  |  |  |  |  |  | 649828864 |
| 4.68 | 163.06 |  |  |  |  |  |  |  |  | 518839232 |
| 5.75 | 163.06 |  |  |  |  |  |  |  |  | 630610624 |
| 2.87 | 144.10188 |  |  |  |  |  |  |  |  | 11064197120 |
| 10.32 | 105.06988 |  |  |  |  |  |  |  |  | 323481376 |
| 1.50 | 365.10541 |  |  |  |  |  |  |  |  | 1352141952 |
| 4.49 | 344.13403 |  |  |  |  |  |  |  |  | 1711620736 |
| 10.05 | 182.08118 |  |  |  |  |  |  |  |  | 934499264 |
| 10.55 | 277.10709 |  |  |  |  |  |  |  |  | 1077087232 |
| 2.03 | 325.112 |  |  |  |  |  |  |  |  | 781901824 |
| 10.36 | 277.10709 |  |  |  |  |  |  |  |  | 319117056 |
| 1.65 | 325.112 |  |  |  |  |  |  |  |  | 262081040 |
| 10.30 | 435.12857 |  |  |  |  |  |  |  |  | 273266976 |
| 13.65 | 177.04042 |  |  |  |  |  |  |  |  | 1056388736 |
| 10.13 | 367.10342 |  |  |  |  |  |  |  |  | 241203552 |
| 11.49 | 823.41107 |  |  |  |  |  |  |  |  | 153371488 |
| 11.58 | 367.11871 |  |  |  |  |  |  |  |  | 134701984 |
| 10.72 | 837.39142 |  |  |  |  |  |  |  |  | 133981784 |
| 1.32 | 179.05612 |  |  |  |  |  |  |  |  | 9837800448 |
| 3.83 | 103.04002 |  |  |  |  |  |  |  |  | 166225392 |
| 9.88 | 164.07172 |  |  |  |  |  |  |  |  | 200359456 |
| 13.46 | 311.16522 |  |  |  |  |  |  |  |  | 178066272 |
| 13.60 | 89.02442 |  |  |  |  |  |  |  |  | 4101970944 |
| 1.16 | 133.01422 |  |  |  |  |  |  |  |  | 26454335488 |
| 1.74 | 111.00872 |  |  |  |  |  |  |  |  | 3653775360 |
| 2.47 | 111.00872 |  |  |  |  |  |  |  |  | 2971448576 |
| 2.39 | 111.00872 |  |  |  |  |  |  |  |  | 3073268992 |
| 13.73 | 135.0446 |  |  |  |  |  |  |  |  | 228268112 |
| 11.03 | 135.0446 |  |  |  |  |  |  |  |  | 766607552 |
| 10.30 | 135.0446 |  |  |  |  |  |  |  |  | 590750336 |
| 8.63 | 344.04013 |  |  |  |  |  |  |  |  | 202191680 |
| 0.95 | 119.03443 |  |  |  |  |  |  |  |  | 799770560 |
| 10.96 | 837.39142 |  |  |  |  |  |  |  |  | 261442576 |
| 11.56 | 313.07172 |  |  |  |  |  |  |  |  | 218538560 |
| 1.28 | 85.0295 |  |  |  |  |  |  |  |  | 545158976 |
| 0.95 | 85.0295 |  |  |  |  |  |  |  |  | 164141776 |
| 10.99 | 121.02952 |  |  |  |  |  |  |  |  | 1198189824 |
| 1.21 | 215.03502 |  |  |  |  |  |  |  |  | 2224888576 |
| 13.61 | 283.06122 |  |  |  |  |  |  |  |  | 414129600 |
| 12.03 | 283.06122 |  |  |  |  |  |  |  |  | 3607255552 |
| 5.36 | 407.11951 |  |  |  |  |  |  |  |  | 6352979968 |
| 6.02 | 407.11951 |  |  |  |  |  |  |  |  | 15179356160 |
| 2.29 | 173.00912 |  |  |  |  |  |  |  |  | 538344640 |
| 3.88 | 173.00912 |  |  |  |  |  |  |  |  | 927276224 |
| 2.75 | 129.01932 |  |  |  |  |  |  |  |  | 710225600 |
| 1.80 | 129.01932 |  |  |  |  |  |  |  |  | 405459456 |
| 1.66 | 191.01971 |  |  |  |  |  |  |  |  | 88294006784 |
| 1.23 | 191.01971 |  |  |  |  |  |  |  |  | 51712573440 |
| 9.79 | 191.01971 |  |  |  |  |  |  |  |  | 1669817344 |
| 1.23 | 149.045 |  |  |  |  |  |  |  |  | 458162304 |
| 0.98 | 105.01932 |  |  |  |  |  |  |  |  | 852869888 |
| 11.25 | 299.05612 |  |  |  |  |  |  |  |  | 296880288 |
| 13.60 | 131.03441 |  |  |  |  |  |  |  |  | 865455104 |
| 12.43 | 269.04553 |  |  |  |  |  |  |  |  | 18289121280 |
| 13.26 | 269.04553 |  |  |  |  |  |  |  |  | 451951008 |
| 5.64 | 169.01422 |  |  |  |  |  |  |  |  | 21378029568 |
| 3.86 | 331.06702 |  |  |  |  |  |  |  |  | 155317152 |
| 9.93 | 331.06702 |  |  |  |  |  |  |  |  | 696749696 |
| 12.20 | 401.10889 |  |  |  |  |  |  |  |  | 1172970112 |
| 13.56 | 401.10889 |  |  |  |  |  |  |  |  | 328336544 |
| 11.10 | 821.39655 |  |  |  |  |  |  |  |  | 1815525760 |
| 13.65 | 267.07352 |  |  |  |  |  |  |  |  | 93191272 |
| 1.25 | 267.07352 |  |  |  |  |  |  |  |  | 791198016 |
| 11.40 | 285.04041 |  |  |  |  |  |  |  |  | 1873609216 |
| 10.93 | 285.04041 |  |  |  |  |  |  |  |  | 947157440 |
| 2.61 | 177.04042 |  |  |  |  |  |  |  |  | 1488045056 |
| 0.97 | 177.04042 |  |  |  |  |  |  |  |  | 527992128 |
| 10.97 | 255.06631 |  |  |  |  |  |  |  |  | 882581760 |
| 12.21 | 375.12961 |  |  |  |  |  |  |  |  | 147539296 |
| 2.72 | 115.00372 |  |  |  |  |  |  |  |  | 1223326848 |
| 1.05 | 377.0856 |  |  |  |  |  |  |  |  | 3047576320 |
| 3.88 | 129.01932 |  |  |  |  |  |  |  |  | 1446977024 |
| 5.64 | 125.02387 |  |  |  |  |  |  |  |  | 880263552 |
| 12.18 | 525.16138 |  |  |  |  |  |  |  |  | 88987064 |
| 10.43 | 525.16138 |  |  |  |  |  |  |  |  | 907496128 |
| 1.68 | 75.00822 |  |  |  |  |  |  |  |  | 88384152 |
| 11.43 | 291.08743 |  |  |  |  |  |  |  |  | 601691392 |
| 1.44 | 198.98788 |  |  |  |  |  |  |  |  | 483946880 |
| 0.98 | 191.05612 |  |  |  |  |  |  |  |  | 21325877248 |
| 7.62 | 191.05612 |  |  |  |  |  |  |  |  | 855418880 |
| 6.63 | 191.05612 |  |  |  |  |  |  |  |  | 2078949632 |
| 14.10 | 539.13843 |  |  |  |  |  |  |  |  | 77524056 |
| 1.01 | 539.13843 |  |  |  |  |  |  |  |  | 271530784 |
| 12.02 | 253.05061 |  |  |  |  |  |  |  |  | 351891584 |
| 13.57 | 223.06122 |  |  |  |  |  |  |  |  | 117709864 |
| 13.52 | 665.21454 |  |  |  |  |  |  |  |  | 54898664 |
| 1.08 | 701.19122 |  |  |  |  |  |  |  |  | 100814760 |
| 14.10 | 701.19122 |  |  |  |  |  |  |  |  | 25868784 |
| 3.43 | 665.21454 |  |  |  |  |  |  |  |  | 132223440 |
| 2.89 | 665.21454 |  |  |  |  |  |  |  |  | 141394864 |
| 3.43 | 701.19122 |  |  |  |  |  |  |  |  | 47497836 |
| 13.78 | 701.19122 |  |  |  |  |  |  |  |  | 30841270 |
| 12.34 | 341.10892 |  |  |  |  |  |  |  |  | 312066656 |
| 1.04 | 341.10892 |  |  |  |  |  |  |  |  | 737023552 |
| 13.52 | 341.10892 |  |  |  |  |  |  |  |  | 229570000 |
| 10.03 | 373.11401 |  |  |  |  |  |  |  |  | 1616607488 |
| 11.42 | 167.03502 |  |  |  |  |  |  |  |  | 677357376 |
| 4.11 | 827.2674 |  |  |  |  |  |  |  |  | 27763344 |
| 1.30 | 151.06122 |  |  |  |  |  |  |  |  | 936671680 |
| 12.07 | 151.06122 |  |  |  |  |  |  |  |  | 1119486848 |
| 13.60 | 151.06122 |  |  |  |  |  |  |  |  | 774955328 |
| 11.18 | 151.06122 |  |  |  |  |  |  |  |  | 798324992 |
| 11.31 | 807.41724 |  |  |  |  |  |  |  |  | 109172864 |
| 11.63 | 807.41724 |  |  |  |  |  |  |  |  | 83819360 |
| 10.44 | 433.11401 |  |  |  |  |  |  |  |  | 1084770176 |
